# Supplementary material for: Time-dependent epigenomic changes during 3D spheroid culture improve the preclinical modeling of non-small cell lung cancer
Source: Research Square preprint supplement (doi:10.21203/rs.3.rs-8000509/v1), 2025-11-19
Supplement: Supplementary file 1 [file 235b3c443045f1d5dc2999cb.docx]

**SUPPLEMENTARY FILES**

**
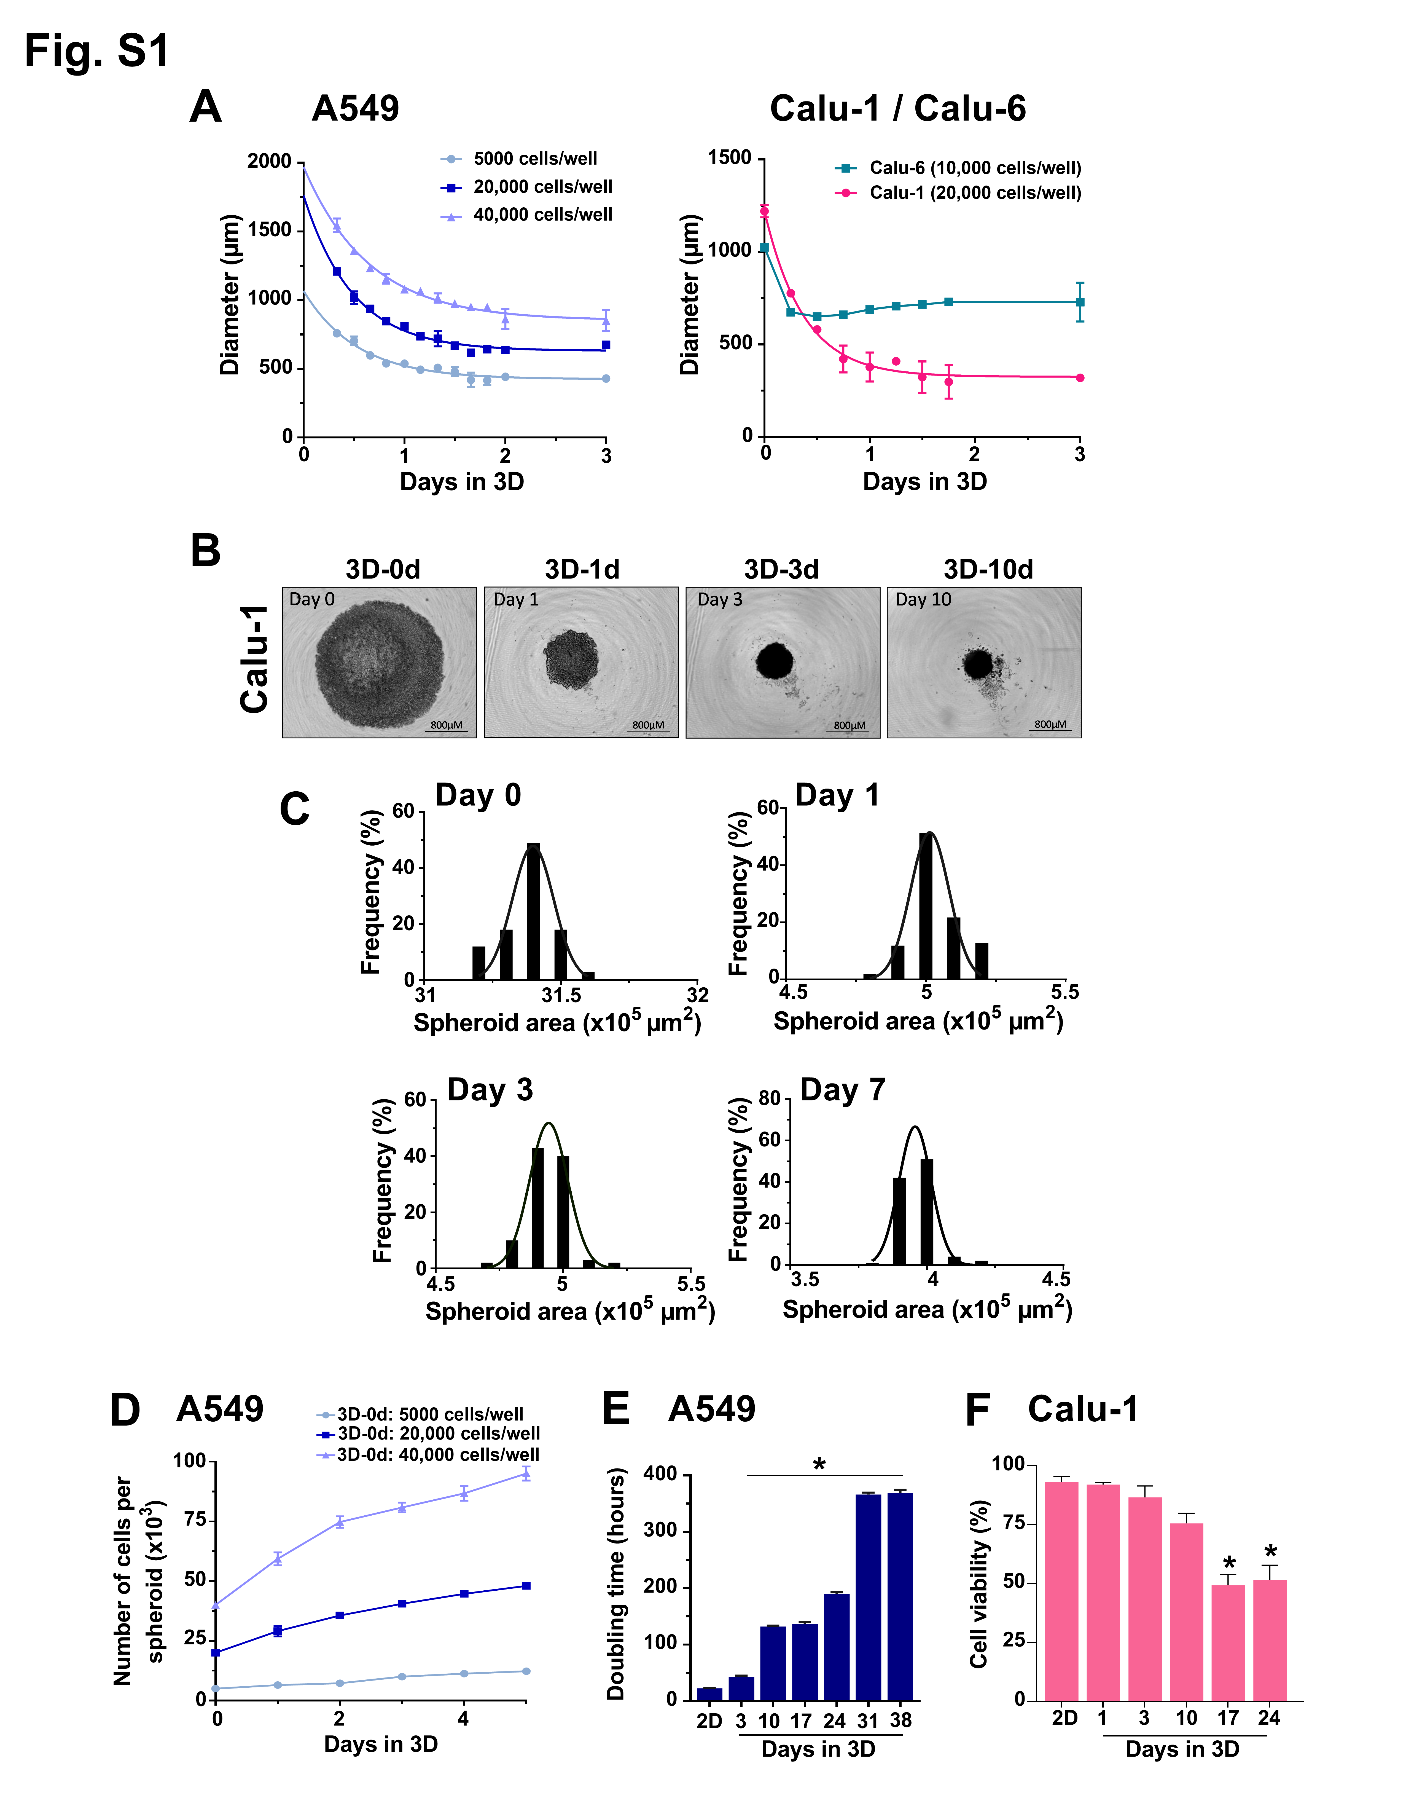
**

Supplementary Figure 1: Characterization of 3D lung cancer spheroids. **A**, Spheroid diameters (µm) in A549 (**A**) and Calu-1 and Calu-6 (**B**) at different initial seeding densities. Diameters and areas were measured every 6–8 hours for the first 2 days and then every 24 hours (mean ± SD, *n* = 3). **B**, Representative bright field microscopy images of Calu-1 cells in 3D spheroid culture on days 0 (immediately after spheroid assembly), 1, 3, and 10. Scale bars, 800 µm. **C**, Frequency distributions of A549 spheroid areas after 0, 1, 3, and 7 days in 3D culture (*n* = 96). **D**, Number of A549 cells per spheroid with different initial seeding densities for the first 5 days of 3D culture. Cells were trypsinized, stained with trypan blue, and manually counted with a hemocytometer (mean ± SD, *n* = 3). **E,** Doubling times of A549 cells grown in 2D culture or as 3D spheroids for 3, 10, 17, 24, 31, and 38 days. **F**, Viability of Calu-1 cells grown in 2D or as spheroids for 1, 3, 10, 17, or 24 days. *, *p* < 0.05 by paired ANOVA.


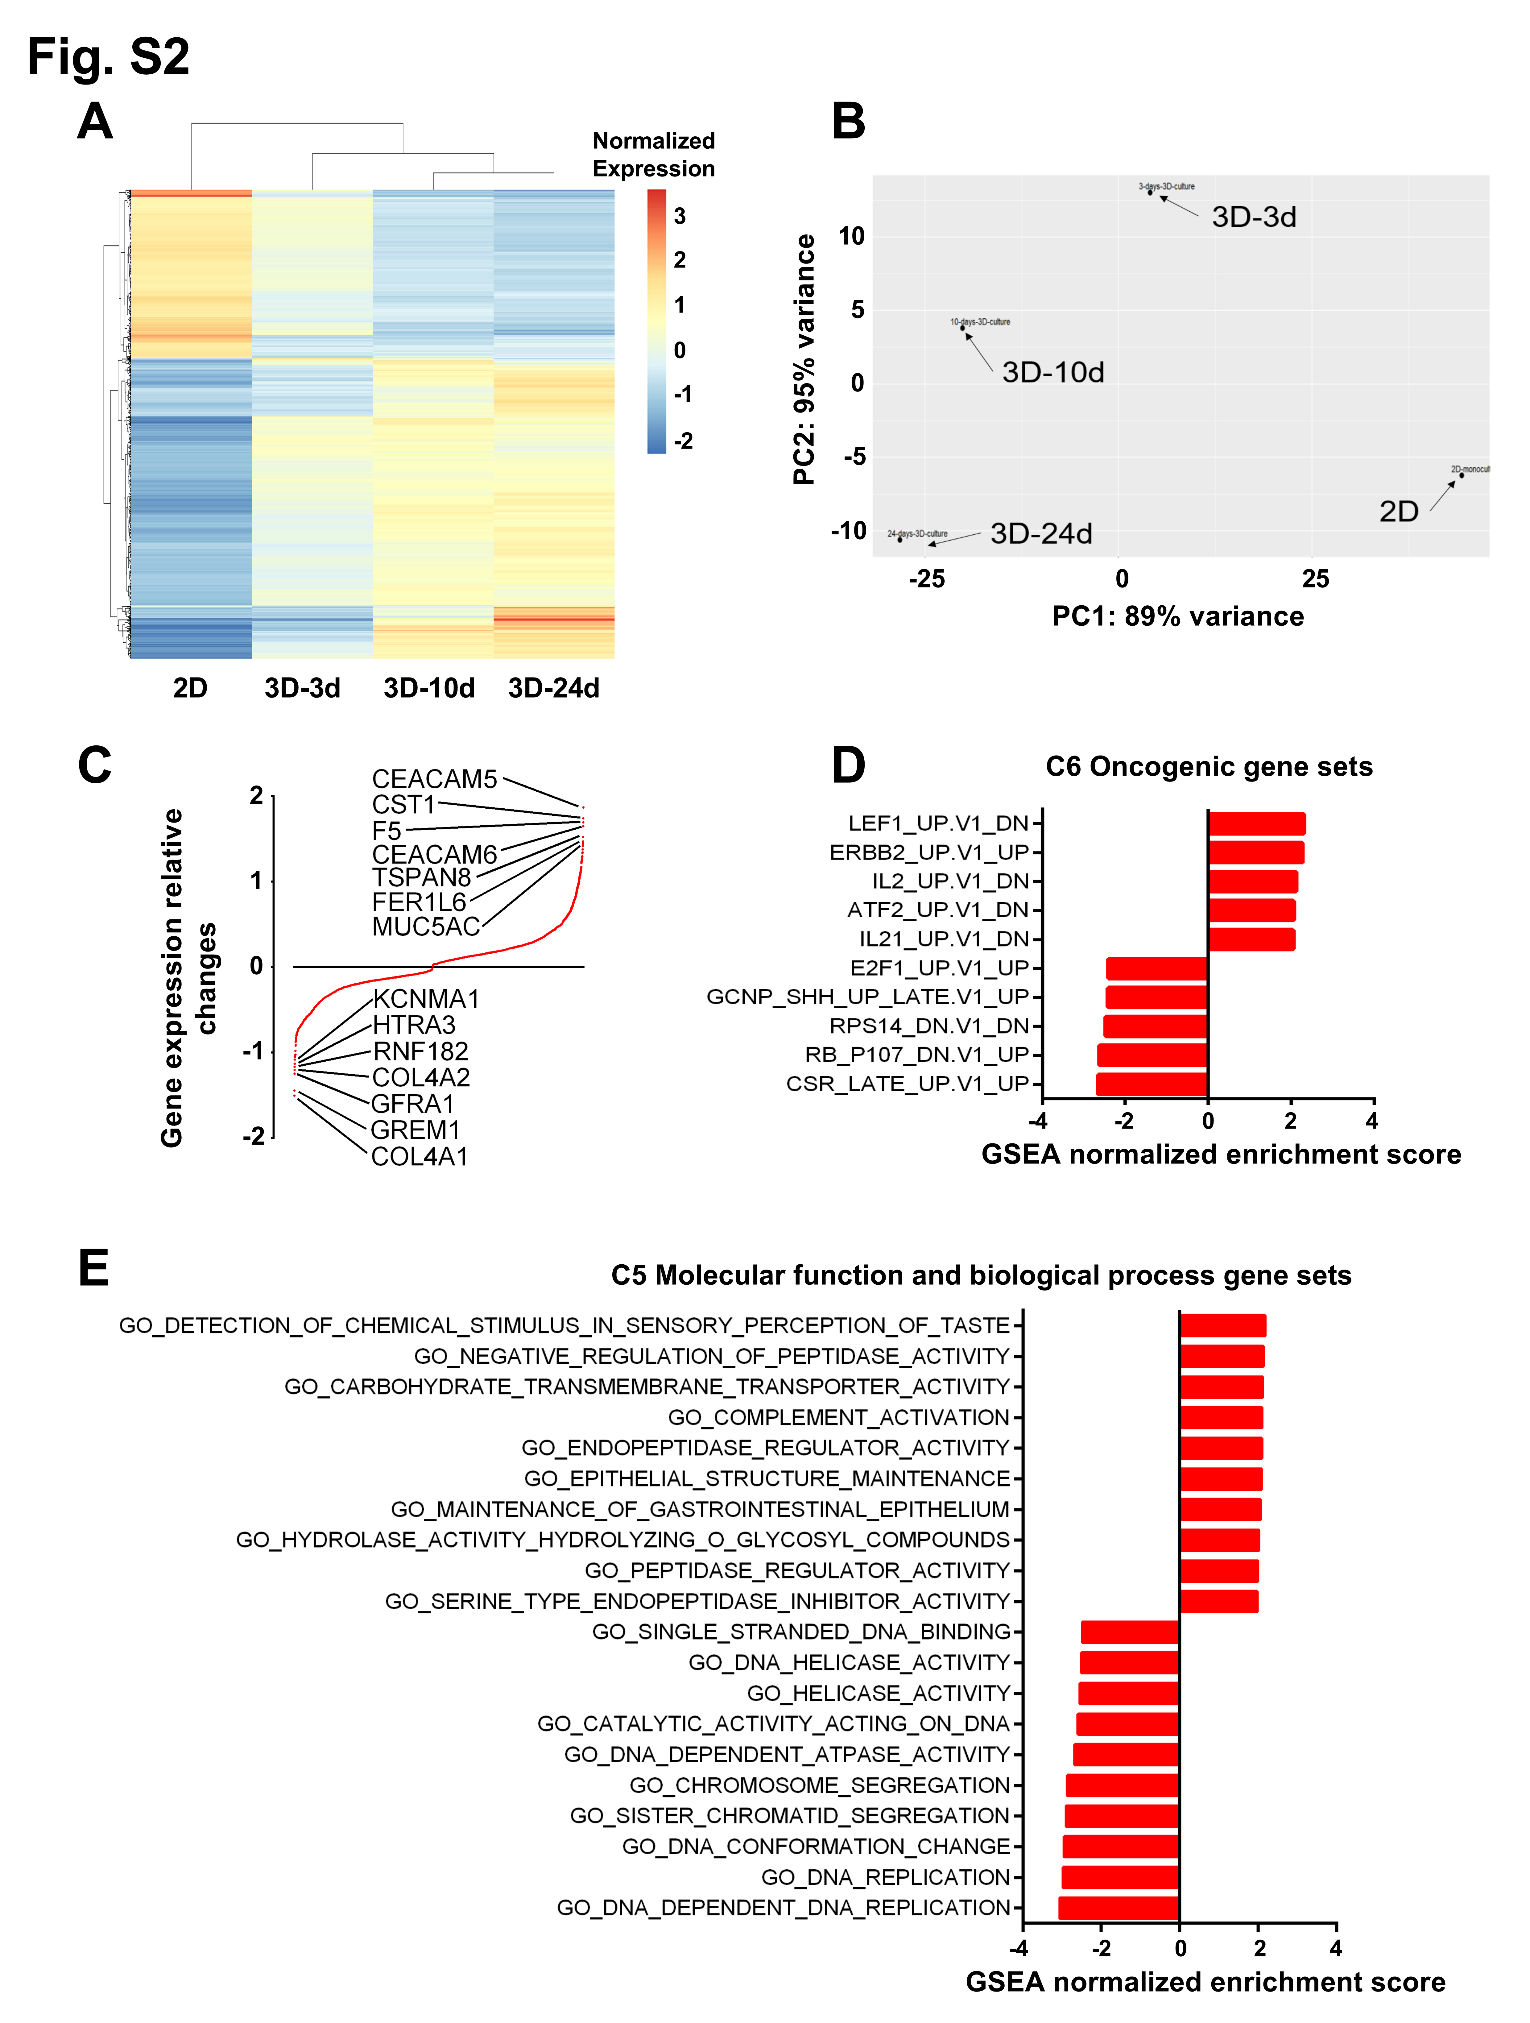


Supplementary Figure 2: Bulk RNA-Seq reveals time-dependent changes in gene expression during 3D culture. **A**, Heatmap of the expression levels of the 25,933 most differentially expressed genes in A549 cells grown in 2D or as 3D spheroids for 3, 10, or 24 days (*n* = 3). **B**, Principal component analysis of A549 cells grown as in A (*n* = 3). **C**, Relative gene expression changes from 2D culture to various durations of 3D culture. A linear regression was calculated to estimate gene expression changes at different time points. Positive and negative values correspond to increased and decreased expression from 2D to 3D, respectively. GSEA analysis using C6 oncogenic gene sets(**D**) and C5 molecular function and biological process gene sets (**E**) comparing gene sets differentially expressed between the progression from 2D culture to long-term 3D spheroid culture (24 days).


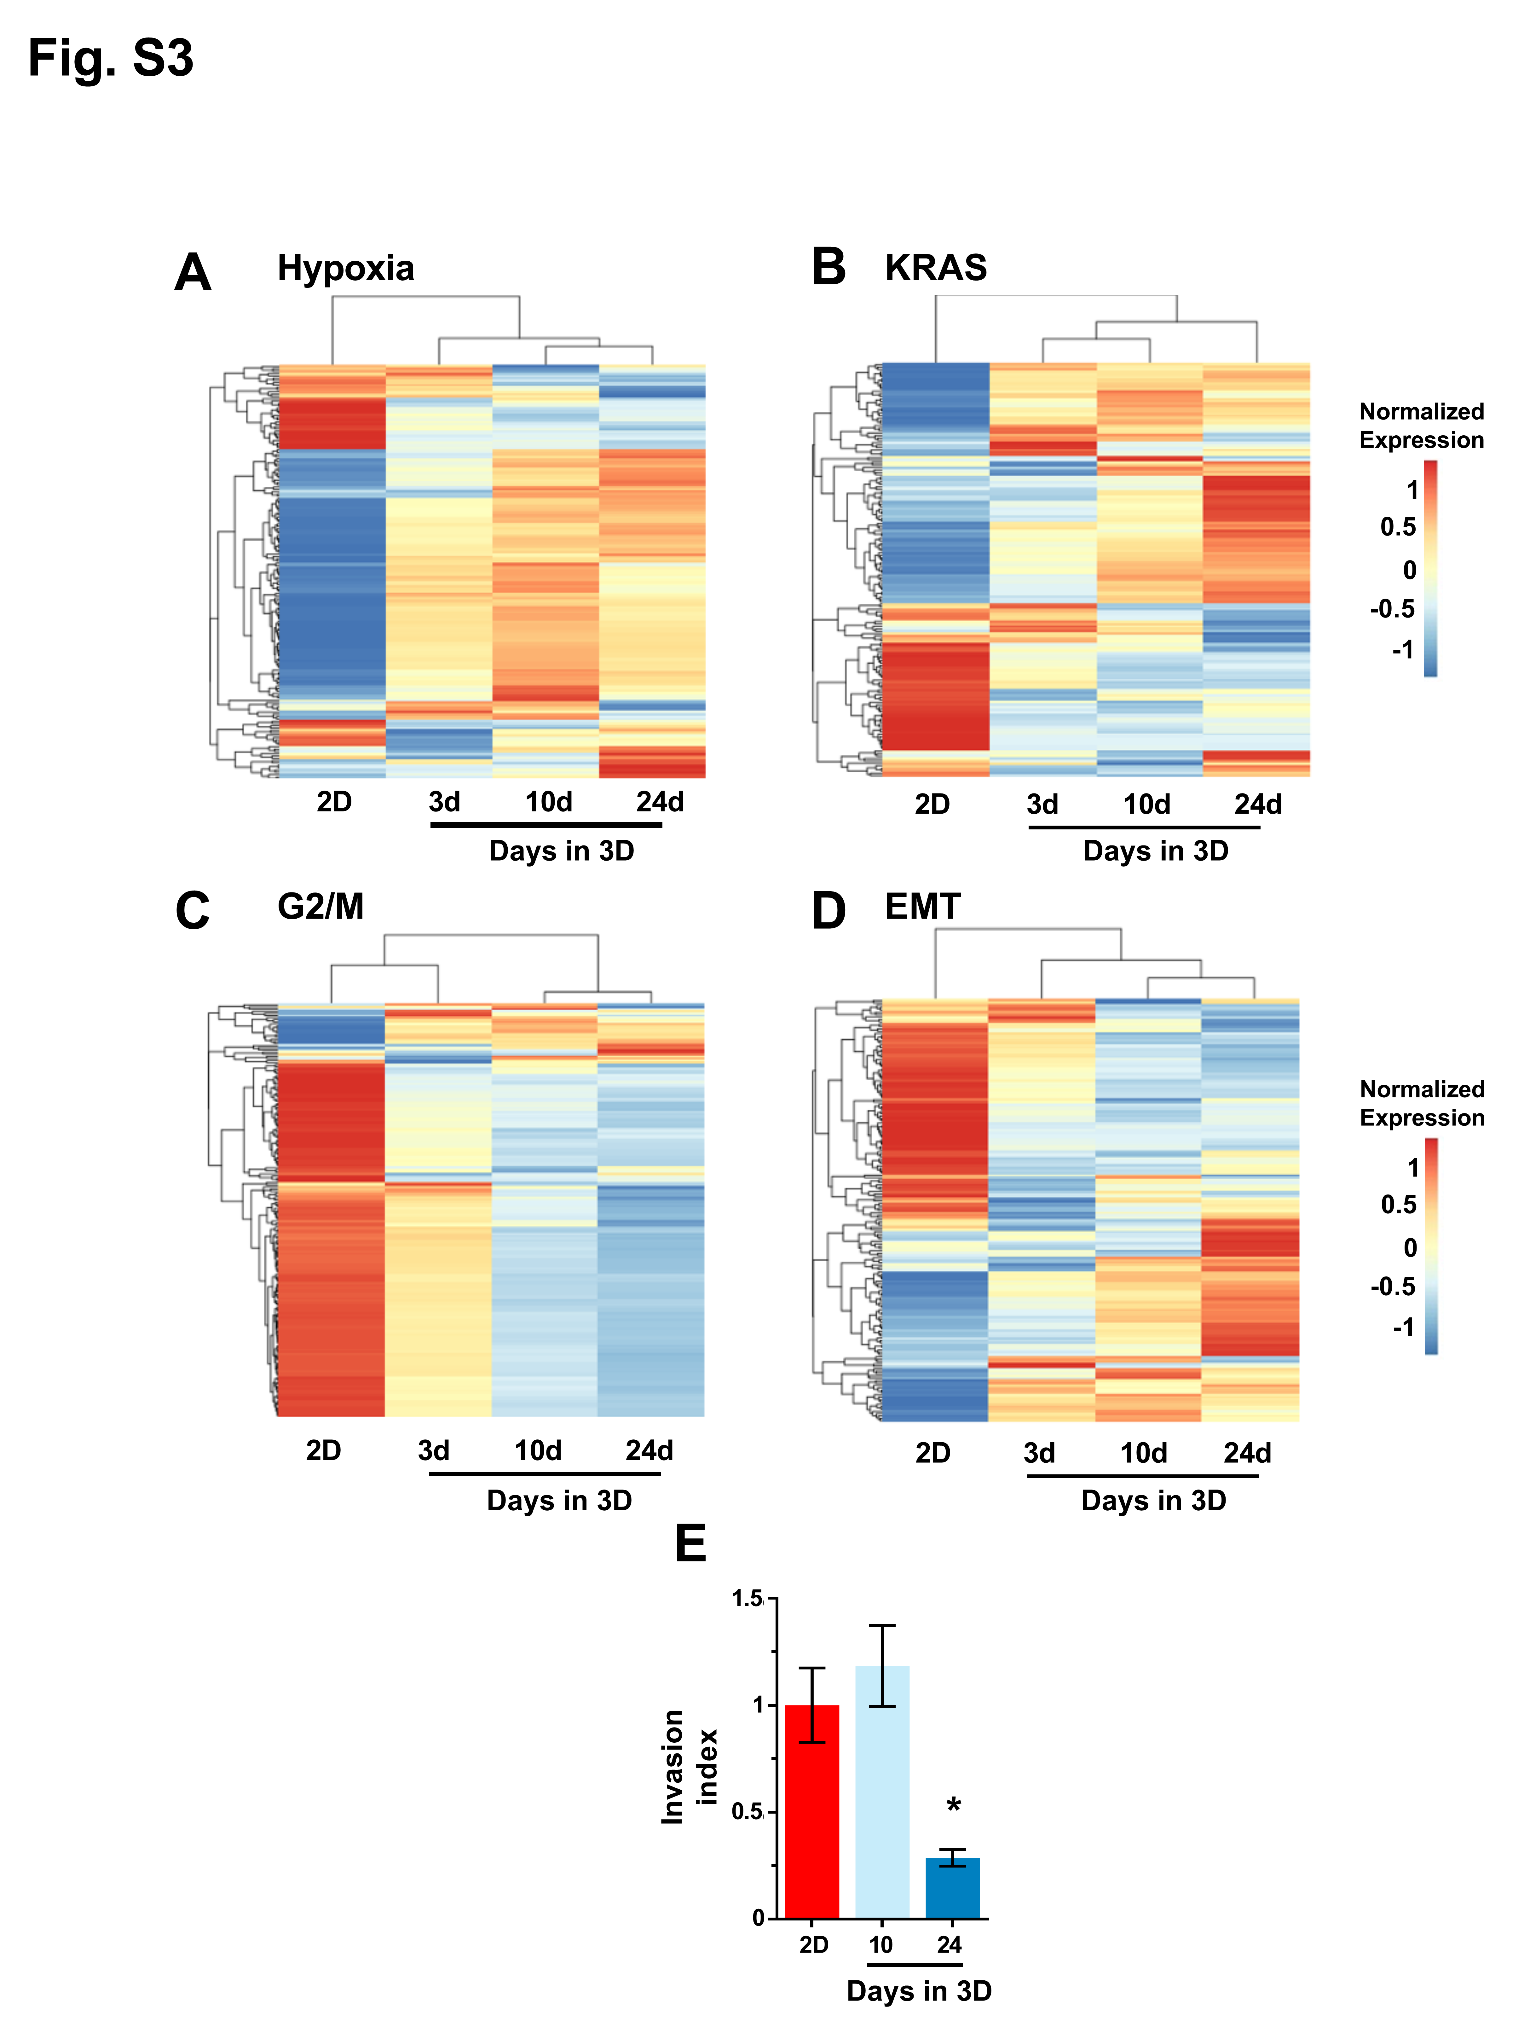


Supplementary Figure 3: Gene expression and EMT phenotype changes in lung A549 spheroids. **A–D,** Heatmaps of expression changes during 3D culture in genes related to **A**, hypoxia, **B**, KRAS signaling, **C**, G2/M, and **D**, EMT pathways. RNA-Seq results were obtained from A549 cells grown in 2D and after 3, 10, and 24 days as 3D spheroids. **E**, Transwell invasion assays of A549 cells grown in 2D and after 10 and 24 days in 3D spheroids. Images were acquired using a bright field DMi6 Leica microscope. Invasion indices were calculated from five distinct fields of the same images (mean ± SEM, *n* = 3; *, *p* < 0.05 by one-way ANOVA).

**
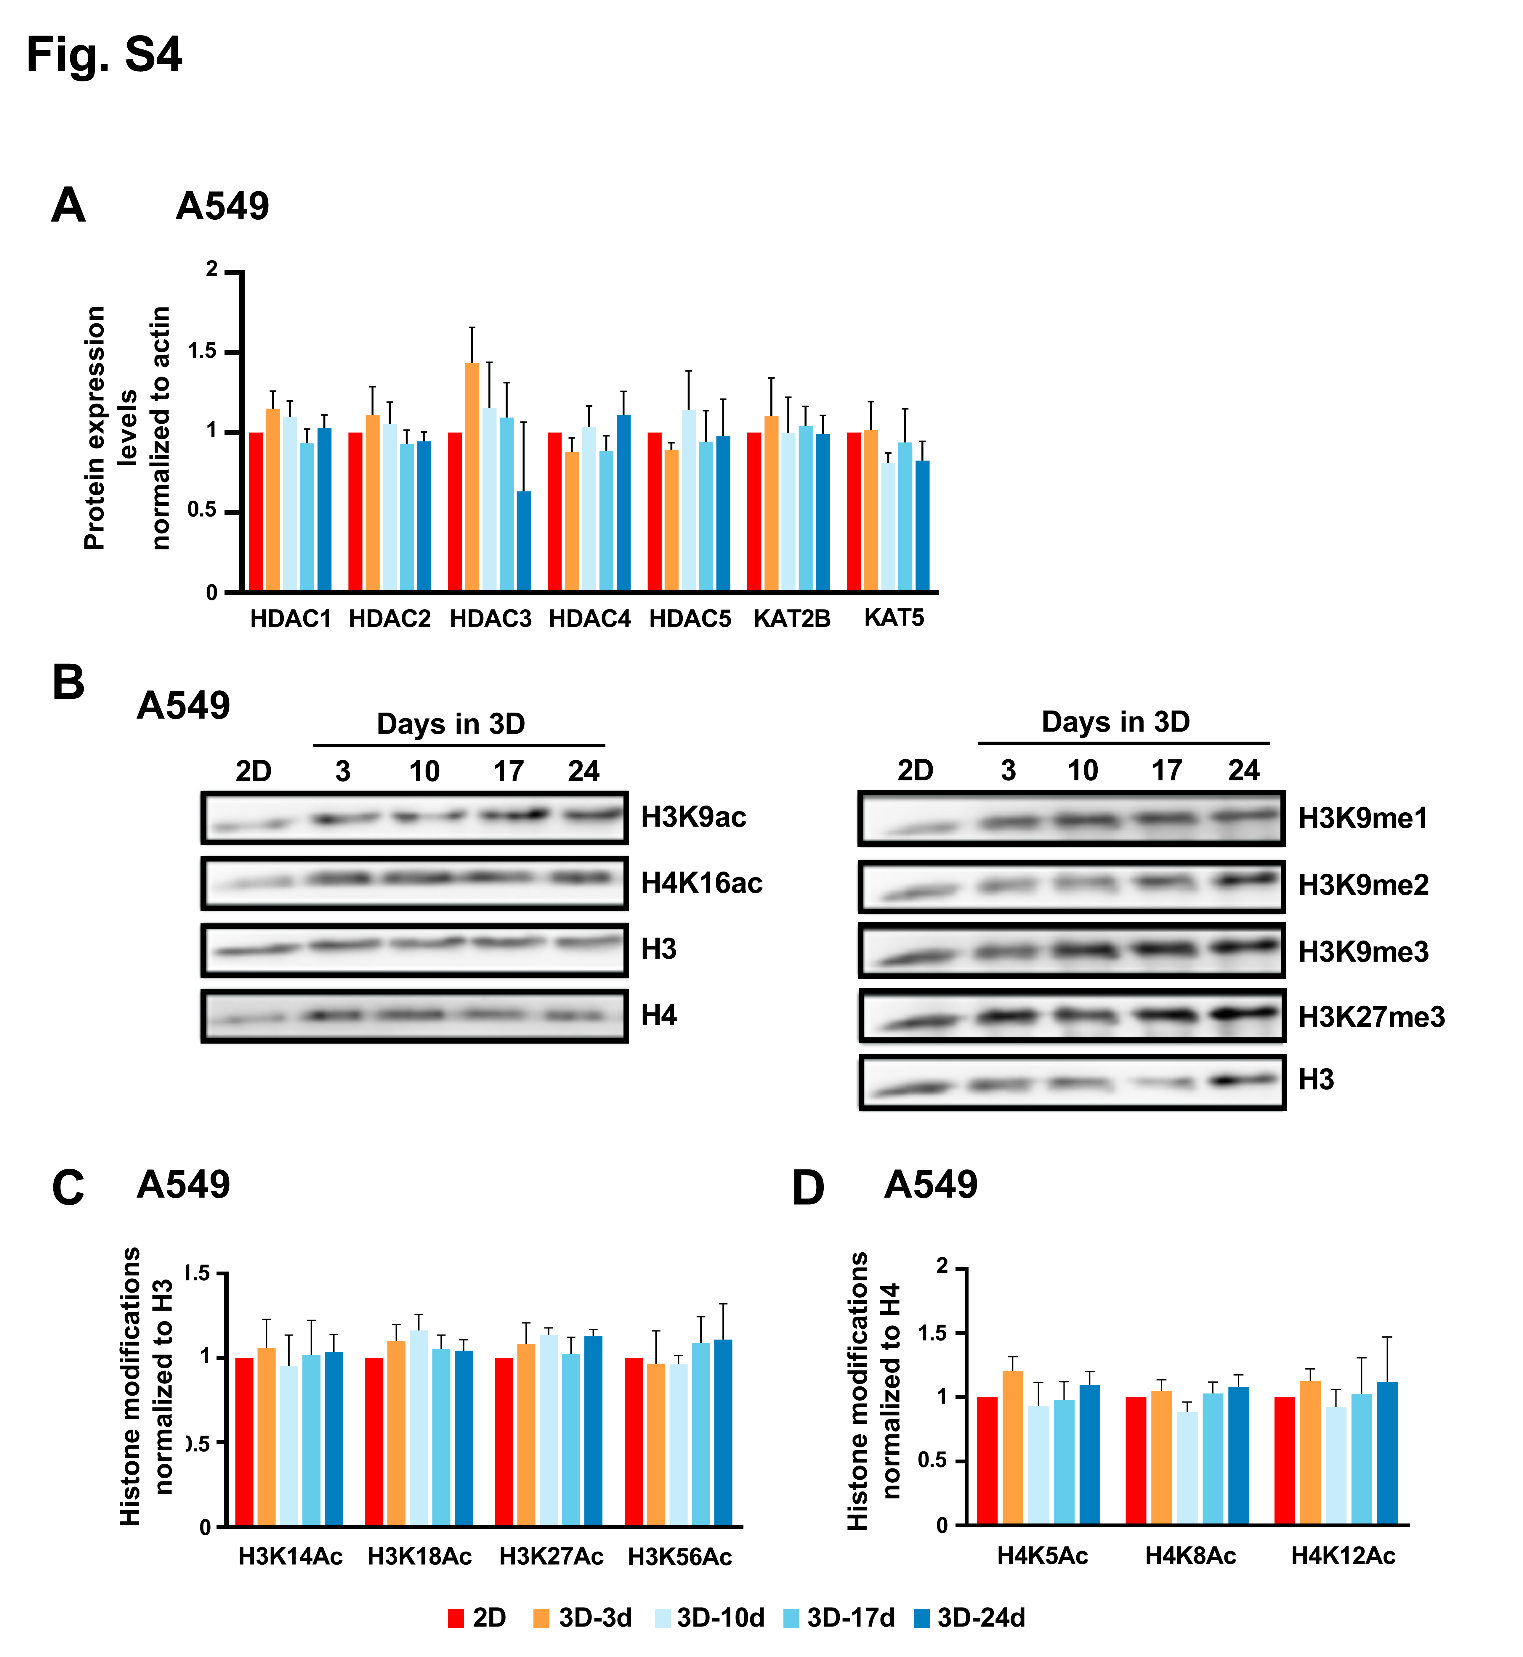
**

Supplementary Figure 4: Epigenetic changes during 3D spheroid culture of A549 cells. **A**, Protein levels of HDAC1, HDAC2, HDAC3, HDAC4, HDAC5, KAT2B, and KAT5 in A549 cells grown in 3D spheroids for 3, 10, 17, and 24 days relative to cells grown in 2D (mean ± SEM, *n* = 3; *, *p* <0.05; by two-way ANOVA). **B**, Representative western blots of H3K9ac, H4K16ac, H3K9me1, H3K9me2, H3K9me3, and H3K27me3 levels in cells grown as in A. Total H3 and H4 were used as loading controls. **C–D**, Quantification of acetylation levels on **C,** H3K14, H3K18, H3K27, H3K56, and **D,** H4K5, H4K8 and H4K12 (mean ± SEM, *n* = 3).


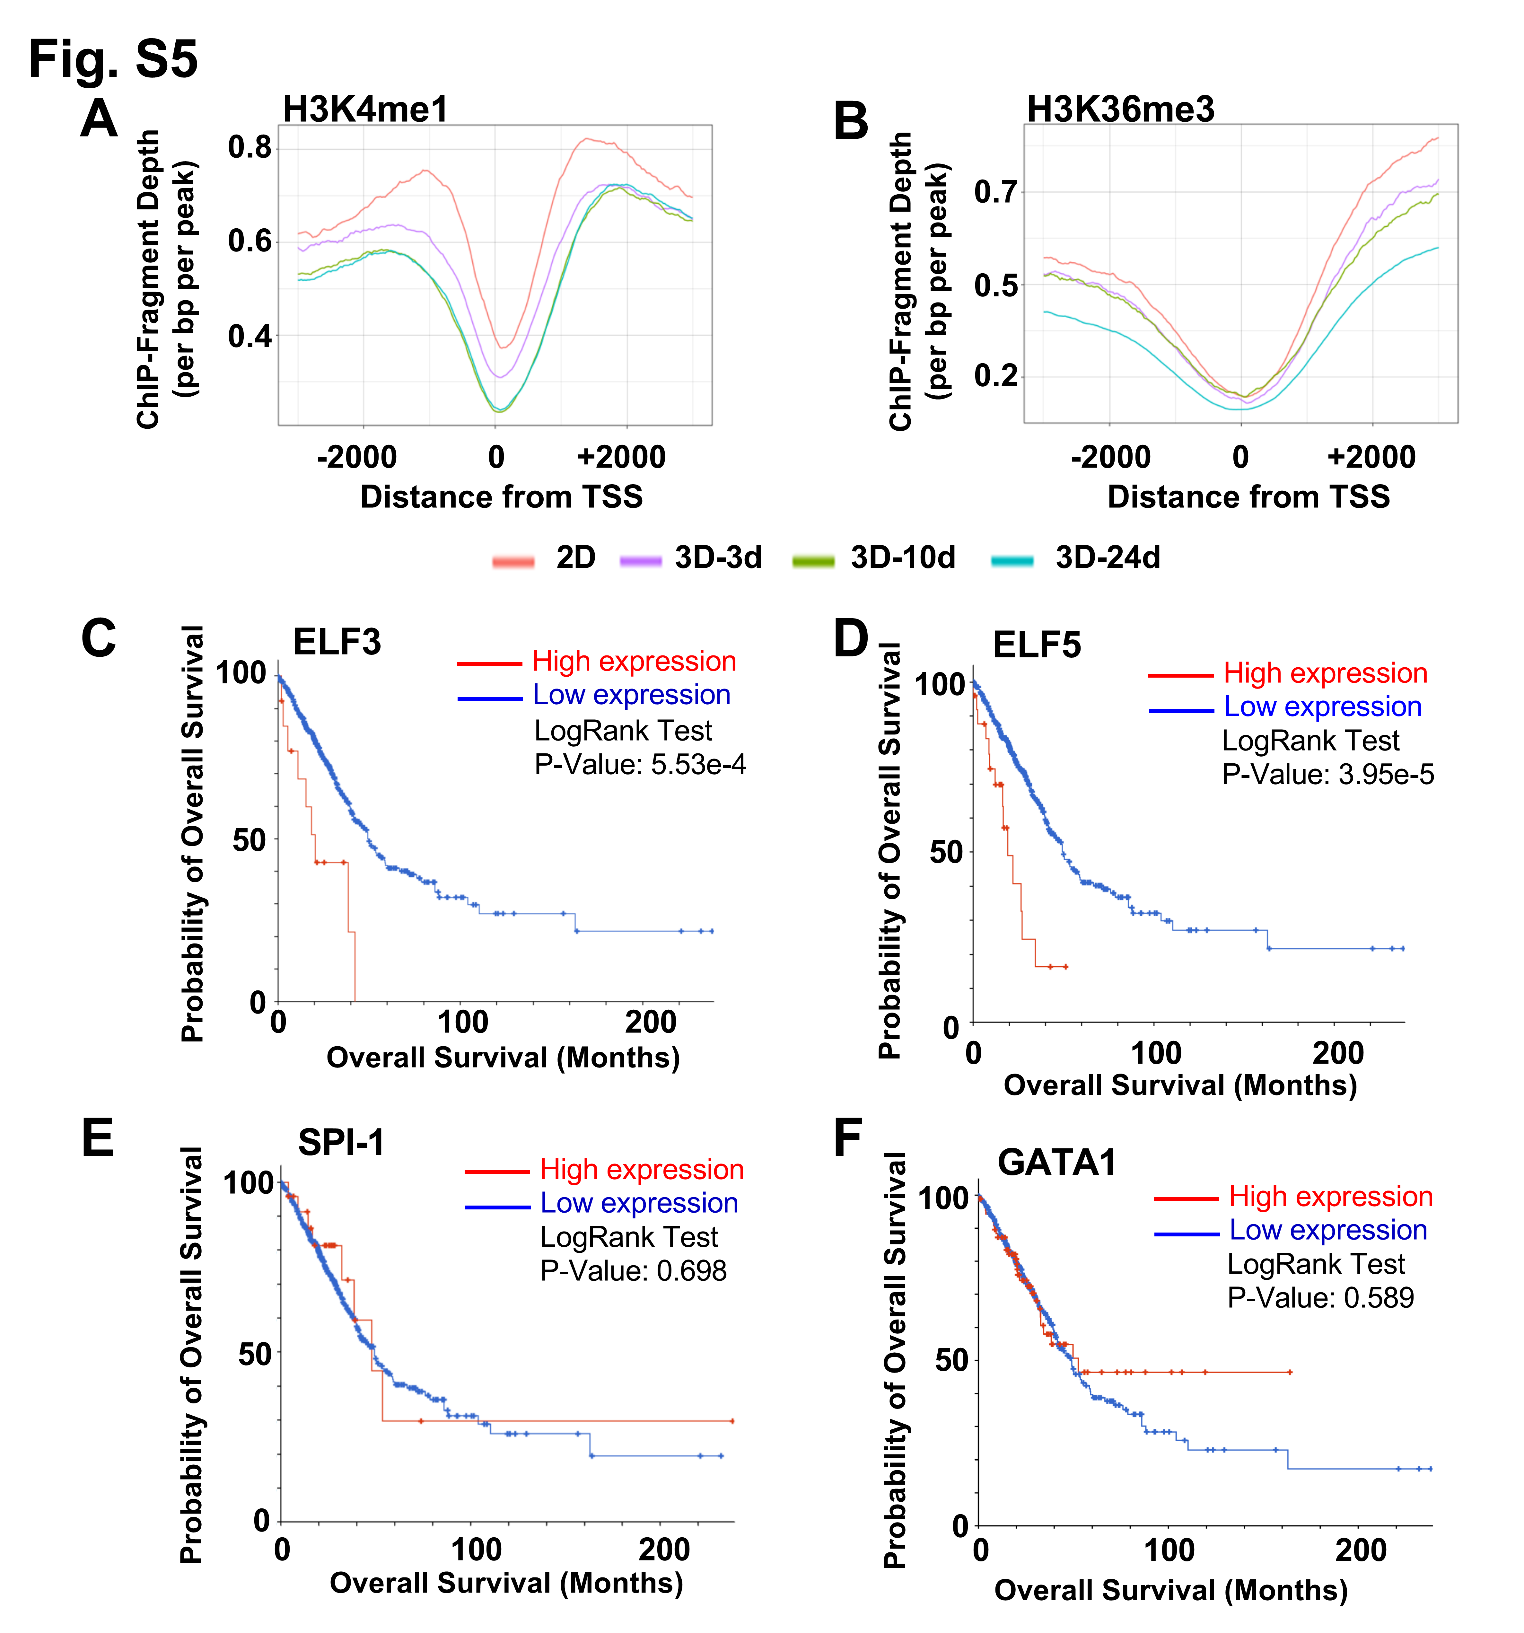


Supplementary Figure 5: Time-dependent changes in histone marks and impacts of transcription factors expressed in 3D spheroids on the survival of patients with NSCLC. **A–B,** ChIP of **A**, H3K4me1 and **B**, H3K36me3 marks centered on transcriptional start sites (TSSs) in A549 cells grown in 2D and in 3D spheroids for 3, 10, and 24 days. **C–F,** Probability of NSCLC survival as a function of the expression levels of **C**, ELF3, **D,** ELF5, **E**, SPI-1, and **F**, GATA1.


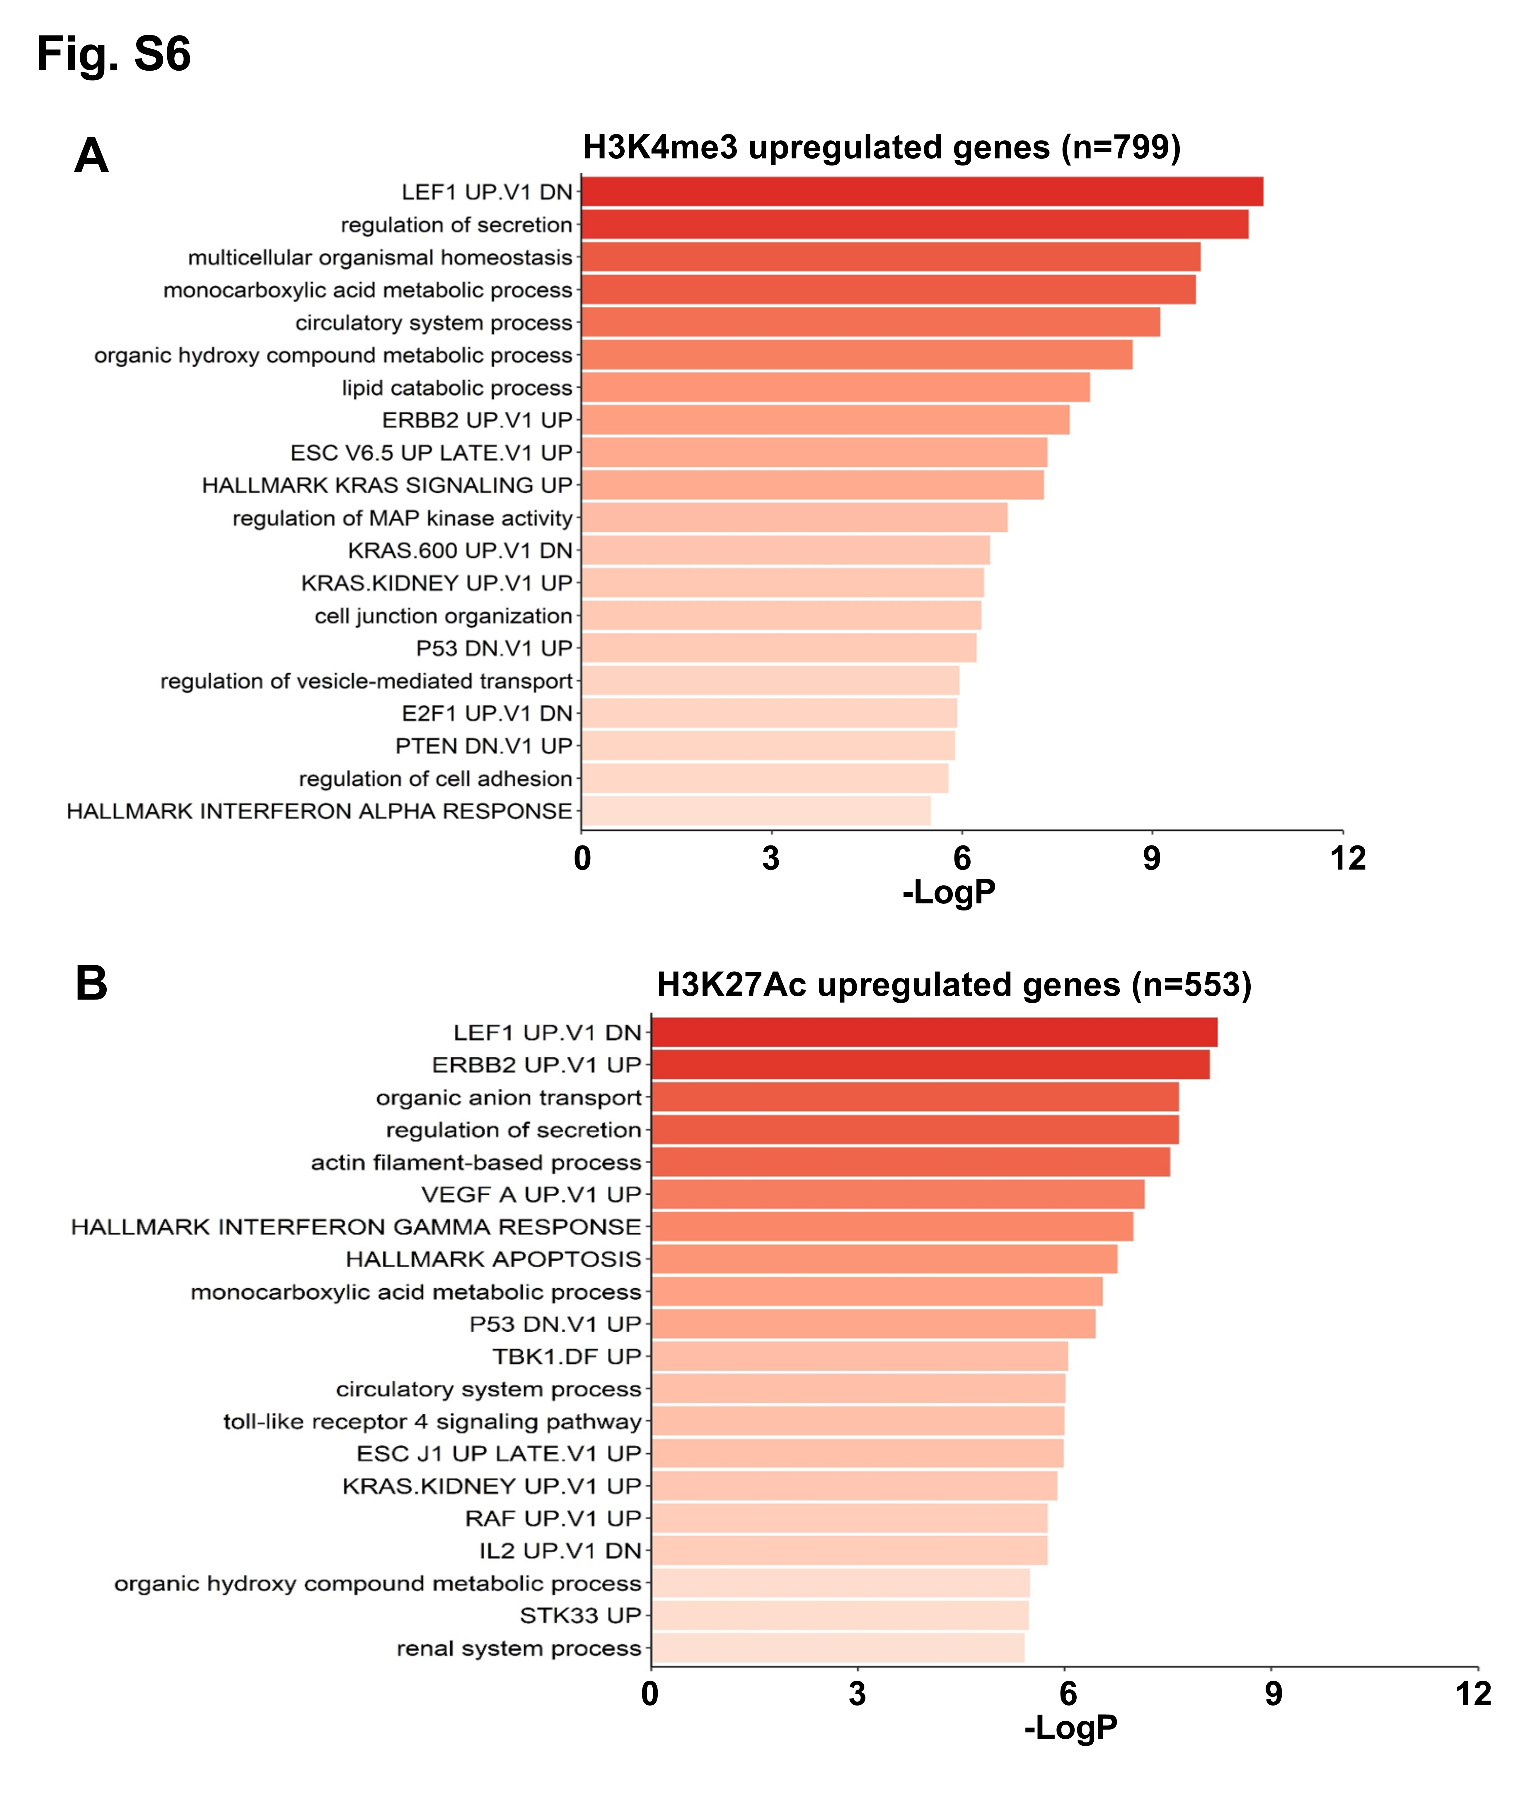


Supplementary Figure 6: GSEA of upregulated genes with promoter modifications after long-term 3D culture. **A–B**, Upregulated genes with promoters marked by **A,** H3K4me3 and **B**, H3K27ac in A549 cells grown as 3D spheroids for 24 days relative to 2D culture.


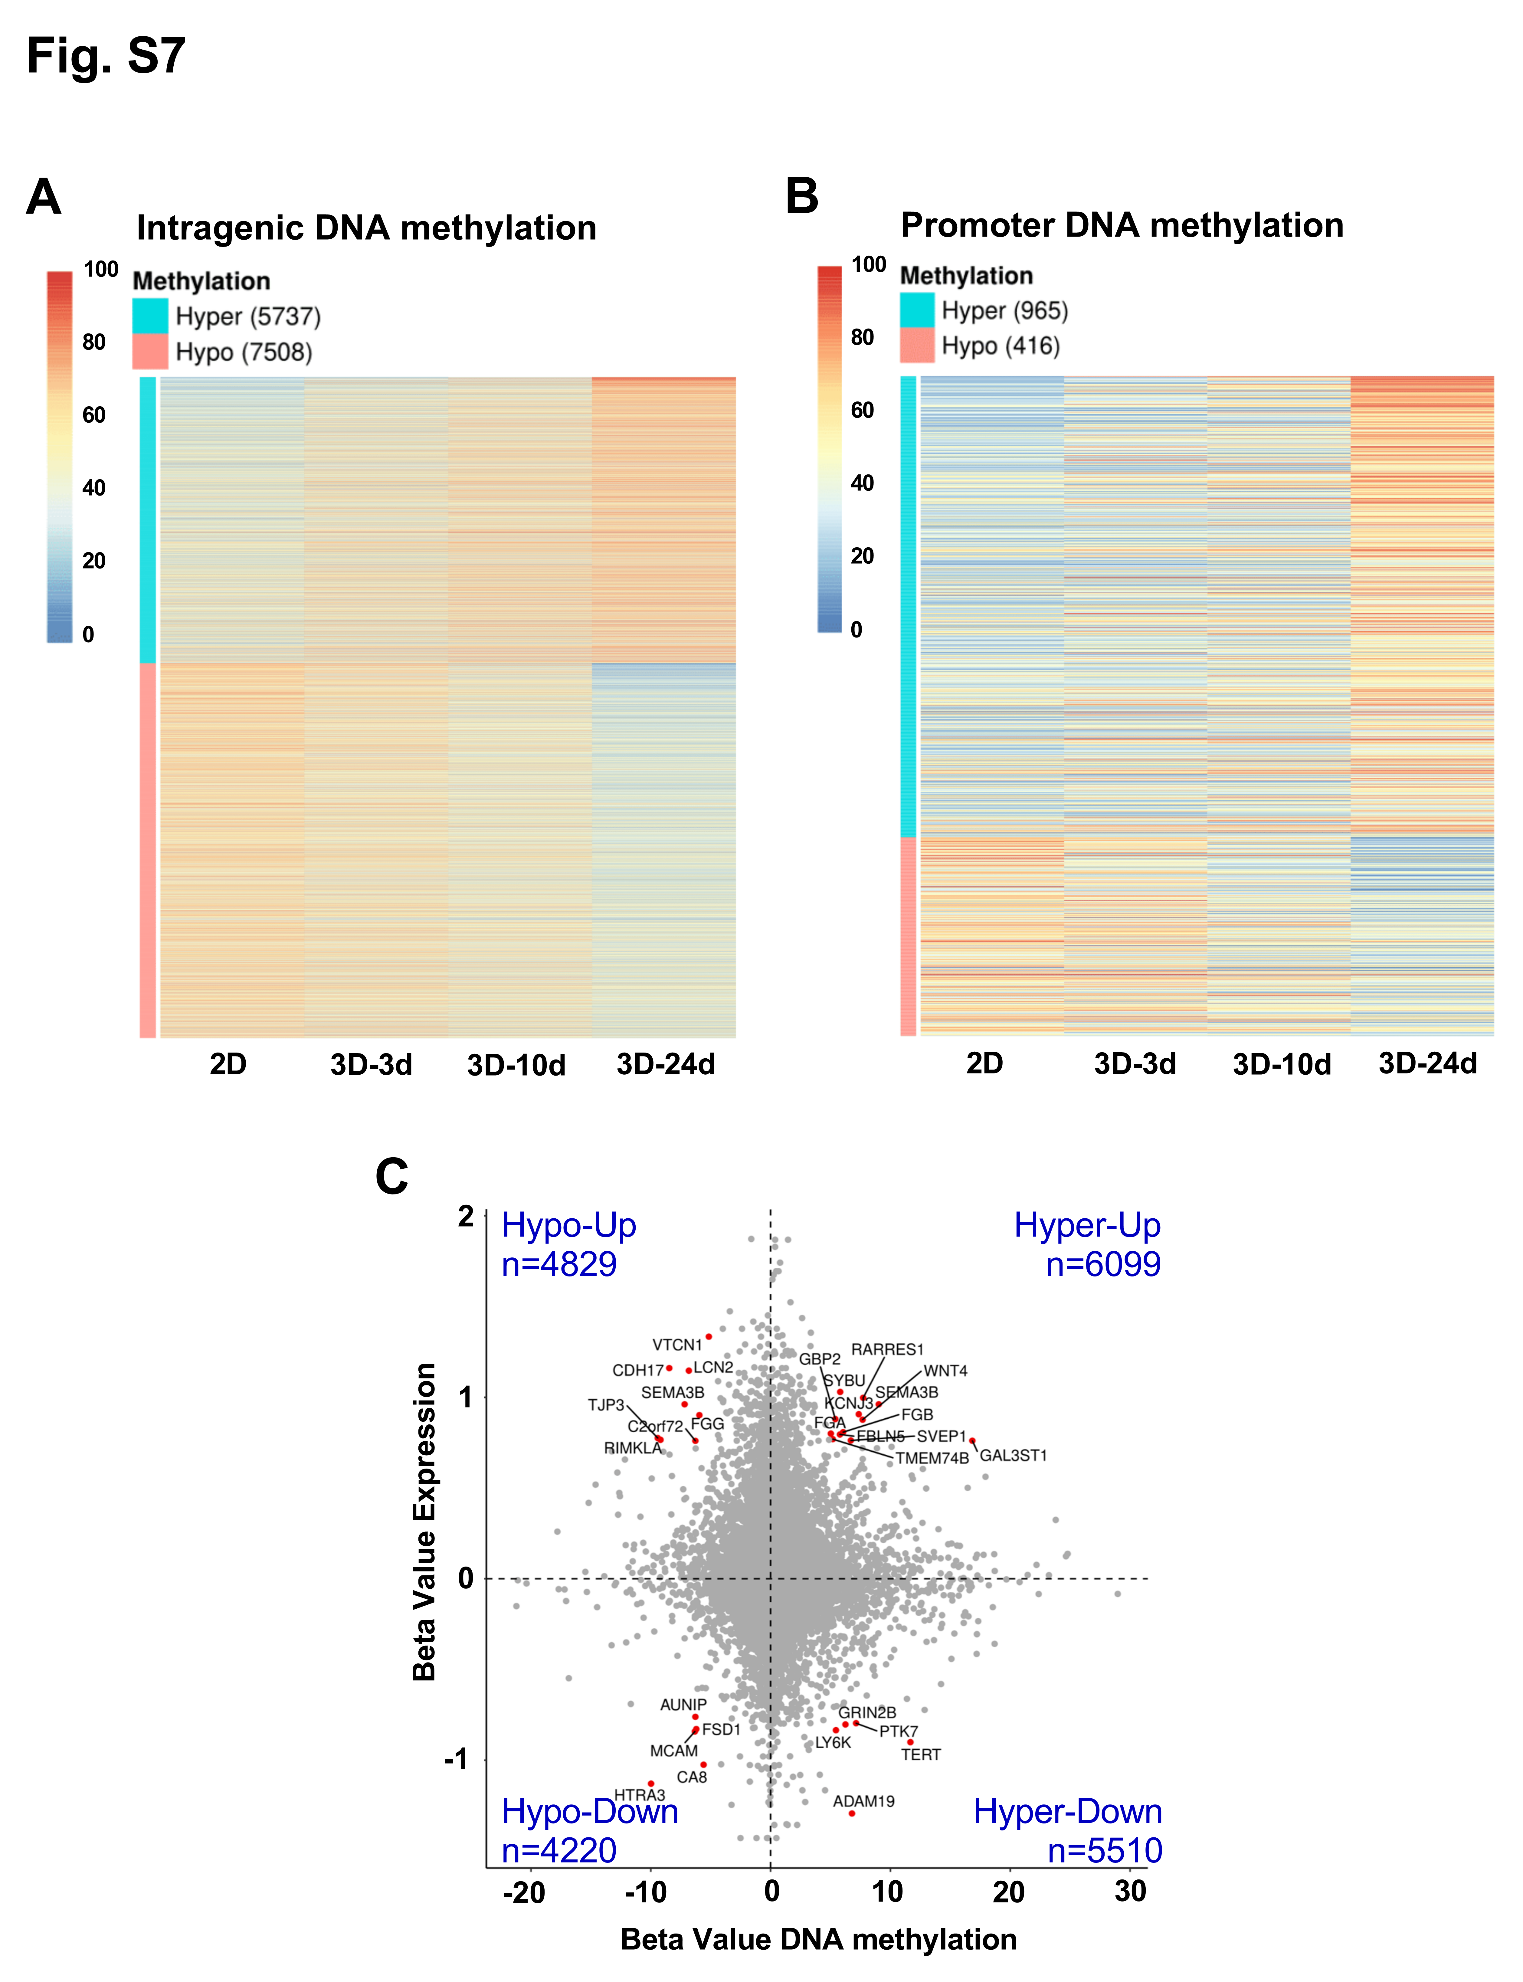


Supplementary Figure 7: WGBS analyses of DNA methylation changes in A549 cells between 2D and 3D spheroid culture. **A–B,** Heatmaps of **A**, intragenic and **B**, promoter DNA methylation levels in A549 cells grown in 2D or after 3, 10, and 24 days in 3D spheroids. **C**, Comparison of beta values for changes in expression vs DNA methylation from 2D culture to 24 days of 3D culture.


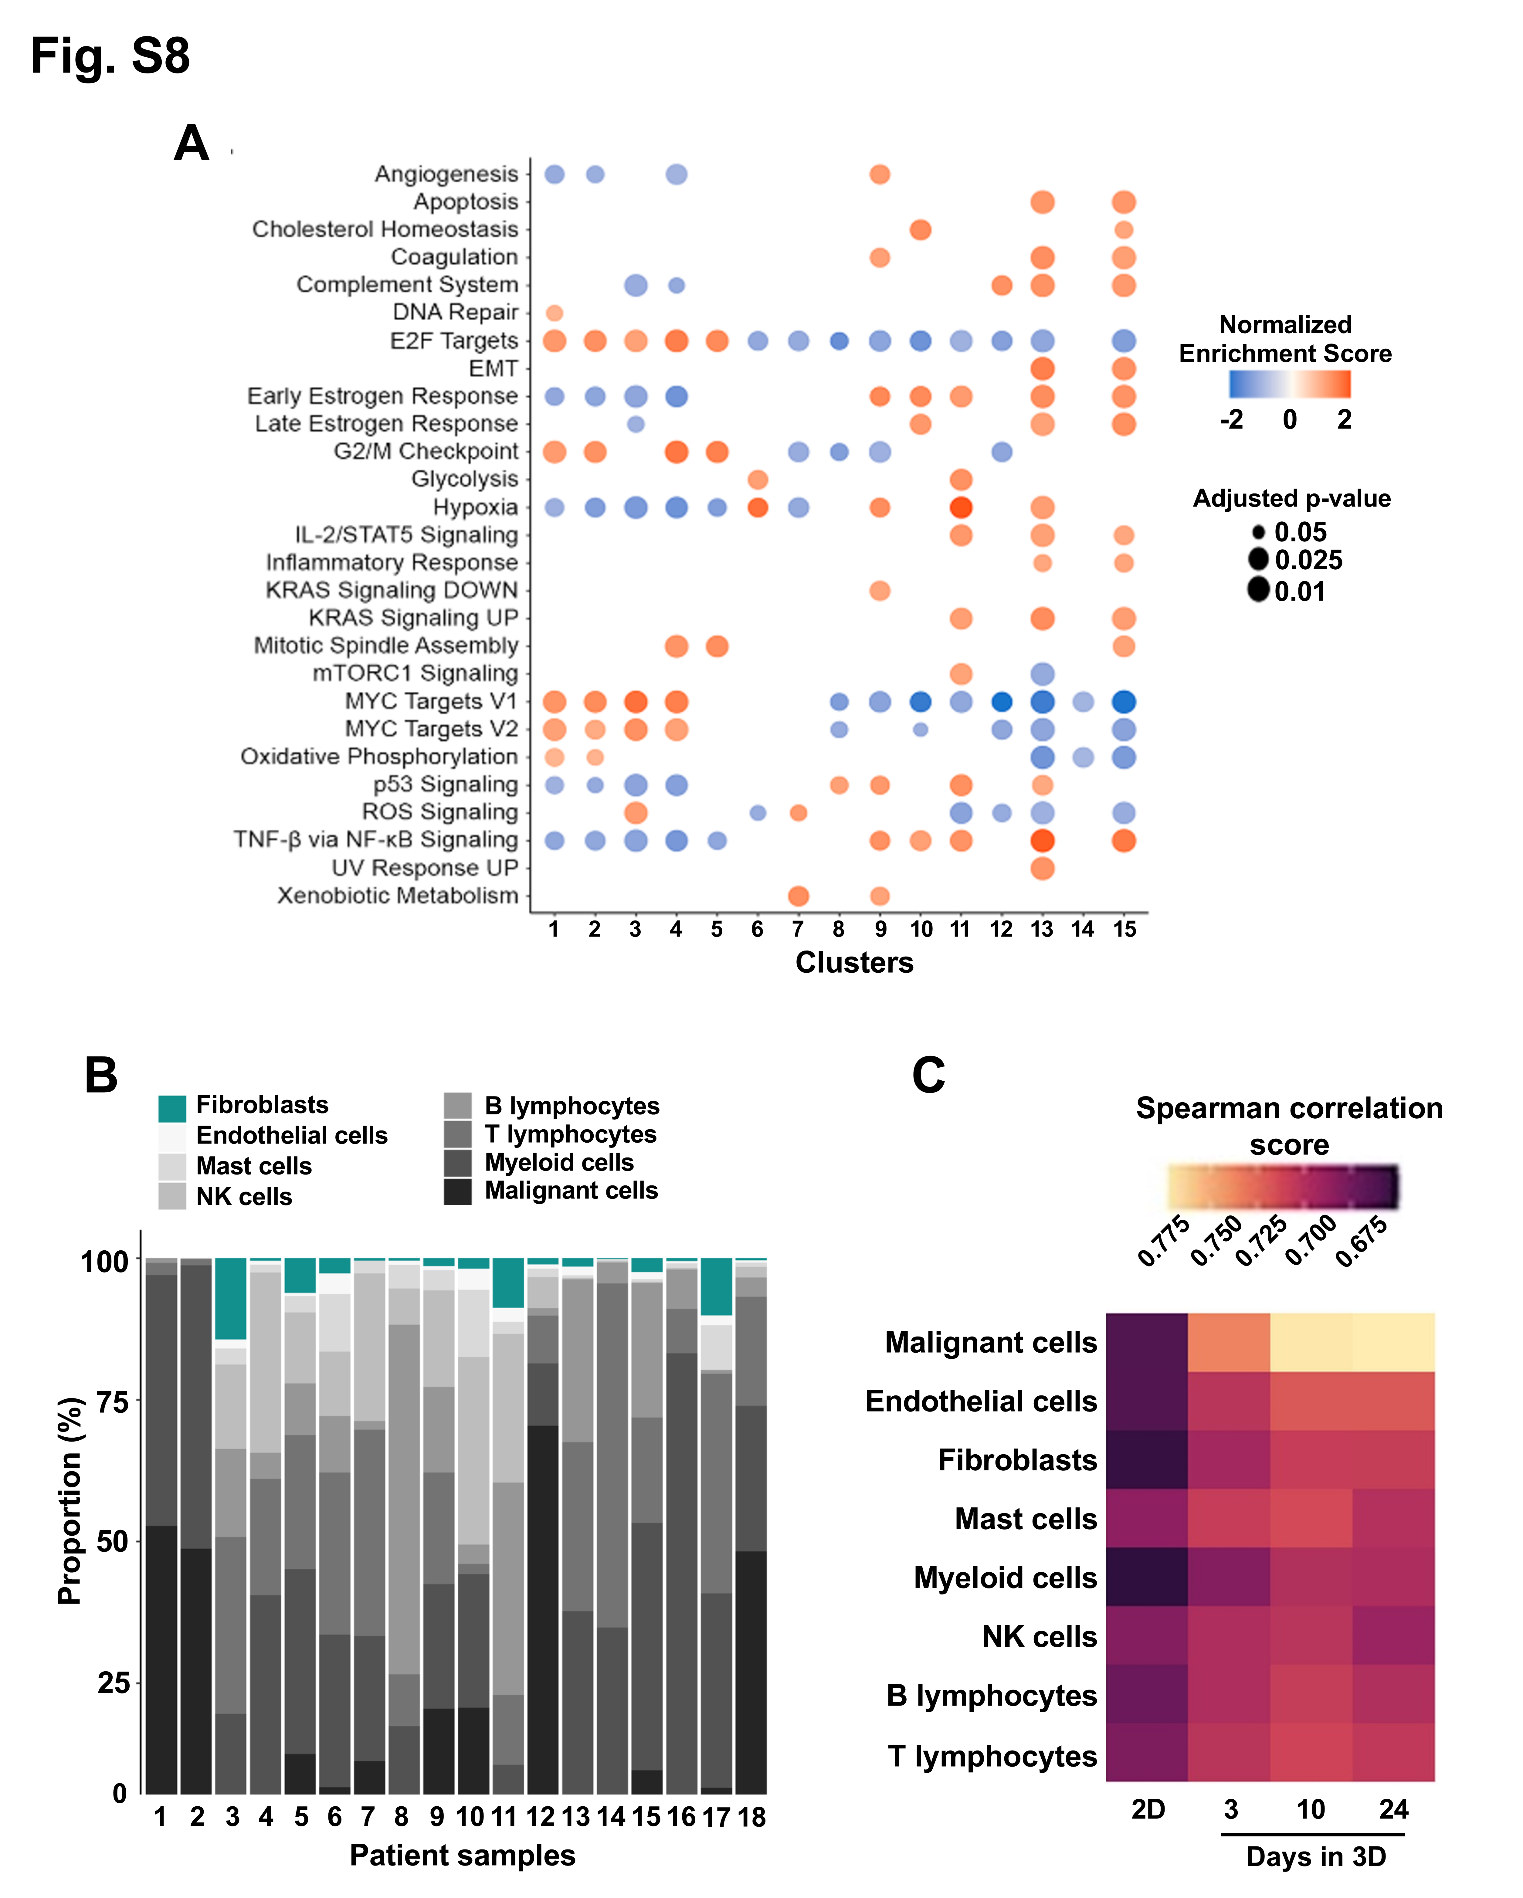


Supplementary Figure 8: Single-cell analysis of A549 spheroids, patient samples and their correlation. **A**, Complete list of enriched pathways in single-sample GSEA between the 15 different clusters. Adjusted *p*-values and normalized enrichment score scales are shown in the graph. **B**, Proportions of normal vs malignant cells in NSCLC samples (*n* = 18). **C**, Spearman correlations between the cell types in the 18 NSCLC samples and A549 cells grown in 2D and 3D culture.


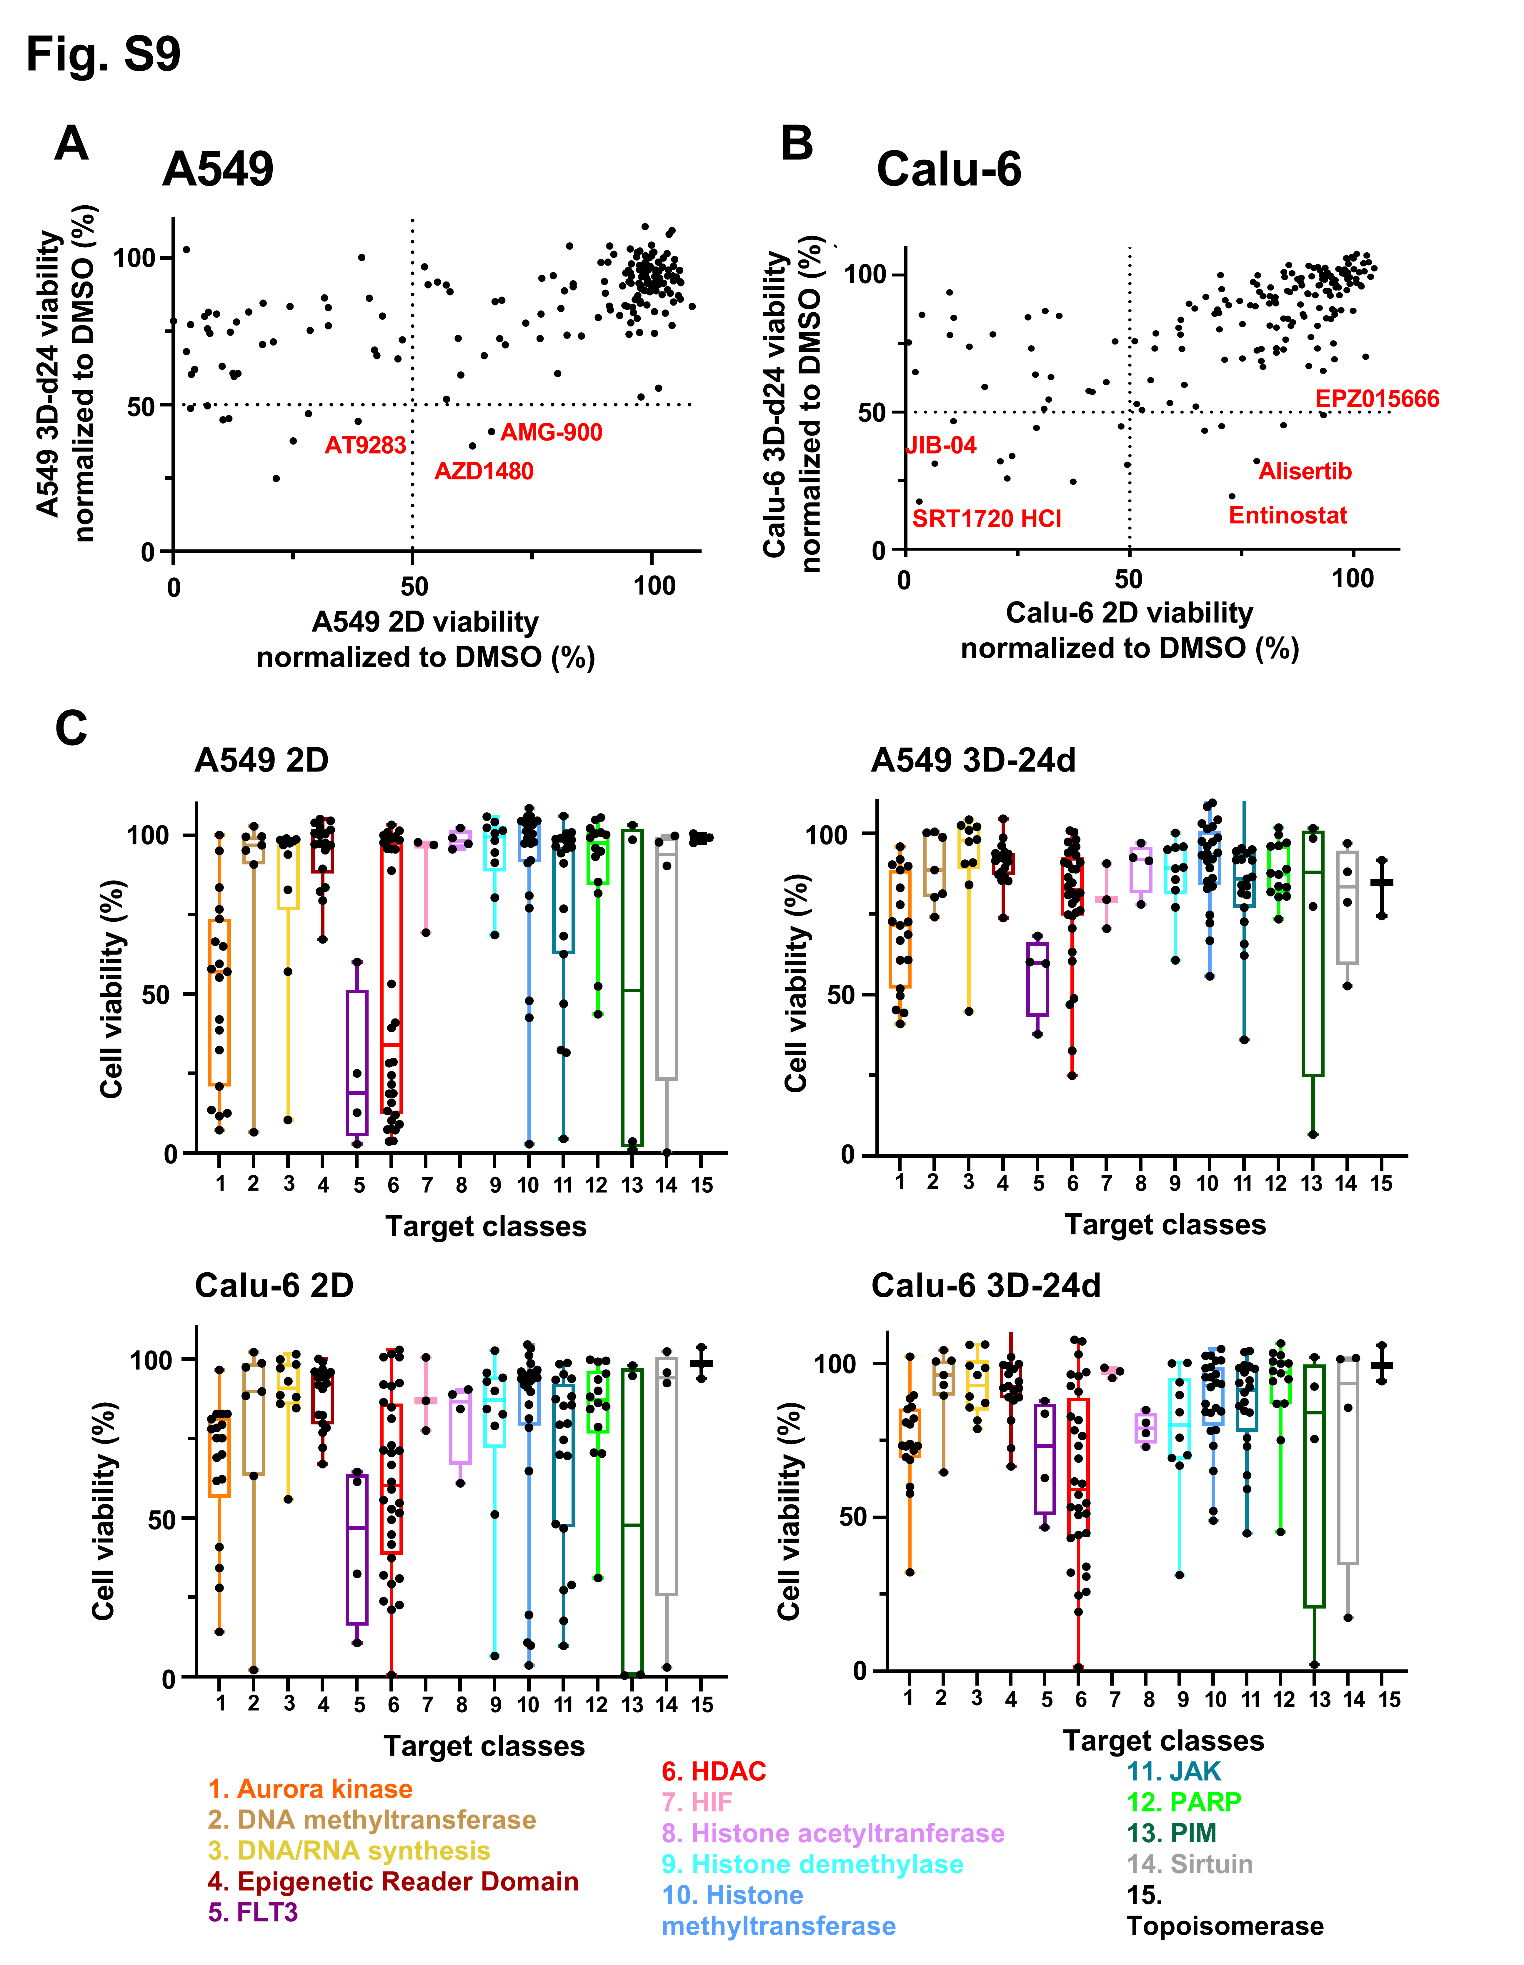


Supplementary Figure 9: Epigenetic drug screening of 2D and 3D A549 and Calu-6 cells. **A–B,** Viability distributions of **A**, A549 and **B**, Calu-6 cells grown in 2D culture and after 24 days in 3D spheroids after treatment with 181 epigenetic drugs (at 10 µM for 48 h). **C**, Viability distributions of the cells in A and B clustered by drug target classes (indicated at the bottom of the figure).

**
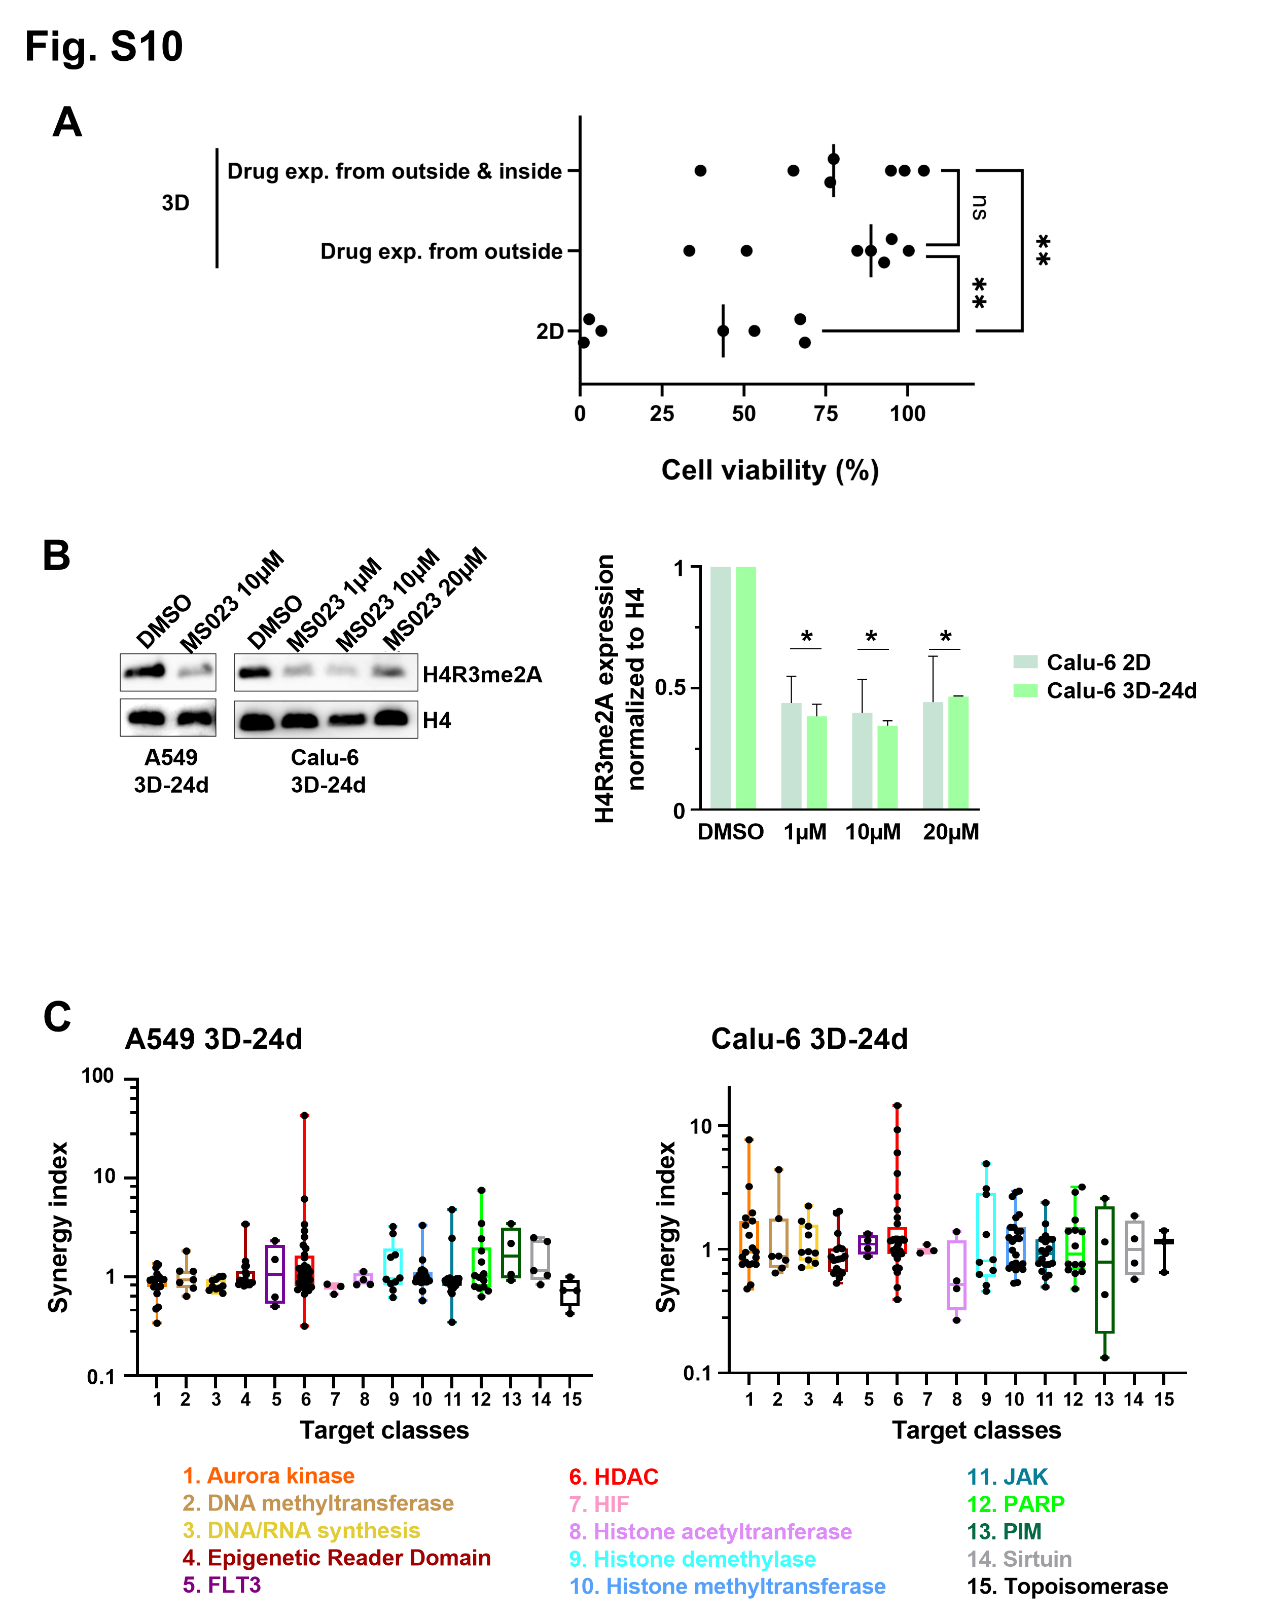
**

Supplementary Figure 10: Effects of PRMT inhibition on NSCLC spheroids. **A**, Drugs can diffuse within spheroids. A549 cells after 24 days of 3D culture were treated for 48 h at 10 µM with 7 drugs of the epigenetic drug library either on assembled spheroids (drugs are administrated directly in the media, and spheroids are exposed from the outside layer) or on trypsin-dissociated spheroids, which are treated and then re-assembled by centrifugation (drug exposure is evenly distributed inside and outside the spheroid). Cell viability was measured and compared between 3D cell conditions and 2D cells exposed (exp.) to drugs. The results showed no significant difference (ns) when drugs were present inside and outside as compared to outside only. However, A549 cells from 3D spheroids showed intrinsic drug resistance after 3D culture for 24 days as compared to 2D cells (**, *p* < 0.05). **B,** Left: Representative western blots of H4R3me2a and total H4 in A549 and Calu-6 cells grown in 2D and for 24 days in 3D spheroids after 48 h of treatment with MS023. Right: Quantification of H4R3me2a in Calu-6 cells at all doses of MS023 (*n* = 3; *, *p* < 0.05). **C**, Viability distributions of A549 (left) and Calu-6 (right) cells grown as 3D spheroids for 24 days and treated for 48 hours with the epigenetic drug library and MS023 (100 µM), clustered by target class.

Supplementary Table 1

Antibodies and dilutions used in this study.

| **Antibody** | **Dilution** | **Supplier and catalog number** |
| --- | --- | --- |
| Actin-β | 1:5000 | Sigma-Aldrich #A2228 |
| BRG1 | 1:1000 | Cell Signaling Technology #49360 |
| Caveolin1 | 1:1000 | Invitrogen #MA3-600 |
| CEACAM6 | 1:1000 | Invitrogen #MA5-29144 |
| CST1 | 1:1000 | Invitrogen #PA5-39123 |
| CST4 | 1:1000 | Invitrogen #MA5-25828 |
| EZH2 | 1:1000 | Invitrogen #MA5-18108 |
| G9a | 1:1000 | Active Motif #91230 |
| H3 | 1:5000 | Active Motif #39763 |
| H3K14ac | 1:5000 | Active Motif #39698 |
| H3K18ac | 1:2500 | Active Motif #39588 |
| H3K27ac | 1:5000 | Active Motif #39134 |
| H3K27m3 | 1:2500 | Active Motif #39155 |
| H3K56ac | 1:5000 | Active Motif # 39282 |
| H3K9ac | 1:5000 | Active Motif #39917 |
| H3K9me1 | 1:5000 | Active Motif #39887 |
| H3K9me2 | 1:5000 | Active Motif #39753 |
| H3K9me3 | 1:5000 | Active Motif #39765 |
| H4 | 1:5000 | Active Motif #39270 |
| H4K12ac | 1:5000 | Active Motif #39928 |
| H4K16Ac | 1:5000 | Active Motif #39167 |
| H4K5ac | 1:2000 | Active Motif #39700 |
| H4K8ac | 1:5000 | Active Motif #39172 |
| H4R3me2a | 1:1000 | Active Motif # 39006 |
| HDAC1 | 1:2500 | Cell Signaling Technology #5356 |
| HDAC2 | 1:1000 | Cell Signaling Technology #5113 |
| HDAC3 | 1:2000 | Cell Signaling Technology #3949 |
| HDAC4 | 1:2500 | Cell Signaling Technology #7628 |
| HDAC5 | 1:1000 | Active Motif #40970 |
| HDAC6 | 1:1000 | Cell Signaling Technology #7558 |
| KAT2A | 1:500 | Santa Cruz Biotechnology #sc-365321 |
| KAT3A | 1:1000 | Cell Signaling Technology #7389 |
| KAT3B | 1:2000 | Active Motif #61402 |
| KAT5 | 1:2500 | Abcam #ab137518 |
| KAT6A | 1:1000 | Active Motif #39868 |
| KAT7 | 1:1000 | Bethyl Laboratories #A302-224A-T |
| LSD1/KDM1 | 1:1000 | Active Motif # 61608 |

Supplementary Table 2

Cell type markers used to isolate malignant cells when analyzing the NSCLC tumor scRNA-Seq data.

| **Cell type** | **Markers** |
| --- | --- |
| Malignant cells | EPCAM, KRT19, KRT18, CDH1 |
| CD4+ T cells | TRAC, CD3G, CD4 |
| T regulatory cells | TRAC, CD3G, FOXP3 |
| CD8+ T cells | TRAC, CD3G, CD8 |
| Fibroblasts | DCN, THY1, COL1A2 |
| Endothelial cells | VWF, CLDN5, RAMP2 |
| Natural killer cells | NKG7, KLRC1, KLRD1 |
| B cells | CD19, MS4A1, CD79A |
| Macrophages | CD68, CD14, FCGR3A |
| Mastocytes | MS4A2, GATA2 |

Supplementary Table 3

List of transcription factor motifs with changes in H3K4me3 mark.

| **Number** | **Motif** |
| --- | --- |
| **1** | AP-1(bZIP)/ThioMac-PU.1-ChIP-Seq(GSE21512)/Homer |
| **2** | Atf3(bZIP)/GBM-ATF3-ChIP-Seq(GSE33912)/Homer |
| **3** | Bach1(bZIP)/K562-Bach1-ChIP-Seq(GSE31477)/Homer |
| **4** | Bach2(bZIP)/OCILy7-Bach2-ChIP-Seq(GSE44420)/Homer |
| **5** | BATF(bZIP)/Th17-BATF-ChIP-Seq(GSE39756)/Homer |
| **6** | BORIS(Zf)/K562-CTCFL-ChIP-Seq(GSE32465)/Homer |
| **7** | CRE(bZIP)/Promoter/Homer |
| **8** | CTCF(Zf)/CD4+-CTCF-ChIP-Seq(Barski_et_al.)/Homer |
| **9** | CTCF-SatelliteElement(Zf?)/CD4+-CTCF-ChIP-Seq(Barski_et_al.)/Homer |
| **10** | E2F(E2F)/Hela-CellCycle-Expression/Homer |
| **11** | E2F1(E2F)/Hela-E2F1-ChIP-Seq(GSE22478)/Homer |
| **12** | E2F4(E2F)/K562-E2F4-ChIP-Seq(GSE31477)/Homer |
| **13** | E2F6(E2F)/Hela-E2F6-ChIP-Seq(GSE31477)/Homer |
| **14** | E2F7(E2F)/Hela-E2F7-ChIP-Seq(GSE32673)/Homer |
| **15** | EBF(EBF)/proBcell-EBF-ChIP-Seq(GSE21978)/Homer |
| **16** | E-box(bHLH)/Promoter/Homer |
| **17** | Egr2(Zf)/Thymocytes-Egr2-ChIP-Seq(GSE34254)/Homer |
| **18** | ELF1(ETS)/Jurkat-ELF1-ChIP-Seq(SRA014231)/Homer |
| **19** | Elk1(ETS)/Hela-Elk1-ChIP-Seq(GSE31477)/Homer |
| **20** | Elk4(ETS)/Hela-Elk4-ChIP-Seq(GSE31477)/Homer |
| **21** | ETS(ETS)/Promoter/Homer |
| **22** | ETS:E-box(ETS,bHLH)/HPC7-Scl-ChIP-Seq(GSE22178)/Homer |
| **23** | Ets1-distal(ETS)/CD4+-PolII-ChIP-Seq(Barski_et_al.)/Homer |
| **24** | Fos(bZIP)/TSC-Fos-ChIP-Seq(GSE110950)/Homer |
| **25** | Fosl2(bZIP)/3T3L1-Fosl2-ChIP-Seq(GSE56872)/Homer |
| **26** | Foxa3(Forkhead)/Liver-Foxa3-ChIP-Seq(GSE77670)/Homer |
| **27** | FOXP1(Forkhead)/H9-FOXP1-ChIP-Seq(GSE31006)/Homer |
| **28** | Fra1(bZIP)/BT549-Fra1-ChIP-Seq(GSE46166)/Homer |
| **29** | Fra2(bZIP)/Striatum-Fra2-ChIP-Seq(GSE43429)/Homer |
| **30** | GFX(?)/Promoter/Homer |
| **31** | GFY-Staf(?,Zf)/Promoter/Homer |
| **32** | HIF2a(bHLH)/785_O-HIF2a-ChIP-Seq(GSE34871)/Homer |
| **33** | HINFP(Zf)/K562-HINFP.eGFP-ChIP-Seq(Encode)/Homer |
| **34** | Hnf1(Homeobox)/Liver-Foxa2-Chip-Seq(GSE25694)/Homer |
| **35** | HNF1b(Homeobox)/PDAC-HNF1B-ChIP-Seq(GSE64557)/Homer |
| **36** | IRF1(IRF)/PBMC-IRF1-ChIP-Seq(GSE43036)/Homer |
| **37** | IRF2(IRF)/Erythroblas-IRF2-ChIP-Seq(GSE36985)/Homer |
| **38** | IRF3(IRF)/BMDM-Irf3-ChIP-Seq(GSE67343)/Homer |
| **39** | IRF8(IRF)/BMDM-IRF8-ChIP-Seq(GSE77884)/Homer |
| **40** | ISRE(IRF)/ThioMac-LPS-Expression(GSE23622)/Homer |
| **41** | Jun-AP1(bZIP)/K562-cJun-ChIP-Seq(GSE31477)/Homer |
| **42** | JunB(bZIP)/DendriticCells-Junb-ChIP-Seq(GSE36099)/Homer |
| **43** | JunD(bZIP)/K562-JunD-ChIP-Seq/Homer |
| **44** | MafK(bZIP)/C2C12-MafK-ChIP-Seq(GSE36030)/Homer |
| **45** | NF1:FOXA1(CTF,Forkhead)/LNCAP-FOXA1-ChIP-Seq(GSE27824)/Homer |
| **46** | NF-E2(bZIP)/K562-NFE2-ChIP-Seq(GSE31477)/Homer |
| **47** | NFE2L2(bZIP)/HepG2-NFE2L2-ChIP-Seq(Encode)/Homer |
| **48** | NFkB-p50,p52(RHD)/Monocyte-p50-ChIP-Chip(Schreiber_et_al.)/Homer |
| **49** | NFkB-p65-Rel(RHD)/ThioMac-LPS-Expression(GSE23622)/Homer |
| **50** | NRF(NRF)/Promoter/Homer |
| **51** | NRF1(NRF)/MCF7-NRF1-ChIP-Seq(Unpublished)/Homer |
| **52** | Nrf2(bZIP)/Lymphoblast-Nrf2-ChIP-Seq(GSE37589)/Homer |
| **53** | p53(p53)/mES-cMyc-ChIP-Seq(GSE11431)/Homer |
| **54** | PU.1:IRF8(ETS:IRF)/pDC-Irf8-ChIP-Seq(GSE66899)/Homer |
| **55** | RAR:RXR(NR),DR5/ES-RAR-ChIP-Seq(GSE56893)/Homer |
| **56** | RFX(HTH)/K562-RFX3-ChIP-Seq(SRA012198)/Homer |
| **57** | Rfx2(HTH)/LoVo-RFX2-ChIP-Seq(GSE49402)/Homer |
| **58** | Ronin(THAP)/ES-Thap11-ChIP-Seq(GSE51522)/Homer |
| **59** | RORg(NR)/Liver-Rorc-ChIP-Seq(GSE101115)/Homer |
| **60** | Sp1(Zf)/Promoter/Homer |
| **61** | T1ISRE(IRF)/ThioMac-Ifnb-Expression/Homer |
| **62** | Tcfcp2l1(CP2)/mES-Tcfcp2l1-ChIP-Seq(GSE11431)/Homer |
| **63** | TR4(NR),DR1/Hela-TR4-ChIP-Seq(GSE24685)/Homer |
| **64** | X-box(HTH)/NPC-H3K4me1-ChIP-Seq(GSE16256)/Homer |
| **65** | YY1(Zf)/Promoter/Homer |
| **66** | ZBTB33(Zf)/GM12878-ZBTB33-ChIP-Seq(GSE32465)/Homer |
| **67** | Zfp281(Zf)/ES-Zfp281-ChIP-Seq(GSE81042)/Homer |
| **68** | Zfp57(Zf)/H1-ZFP57.HA-ChIP-Seq(GSE115387)/Homer |
| **69** | Zfp809(Zf)/ES-Zfp809-ChIP-Seq(GSE70799)/Homer |
| **70** | Zic2(Zf)/ESC-Zic2-ChIP-Seq(SRP197560)/Homer |
| **71** | ZKSCAN1(Zf)/HepG2-ZKSCAN1-ChIP-Seq(Encode)/Homer |
| **72** | ZNF165(Zf)/WHIM12-ZNF165-ChIP-Seq(GSE65937)/Homer |
| **73** | ZNF519(Zf)/HEK293-ZNF519.GFP-ChIP-Seq(GSE58341)/Homer |
| **74** | ZNF669(Zf)/HEK293-ZNF669.GFP-ChIP-Seq(GSE58341)/Homer |
| **75** | ZNF692(Zf)/HEK293-ZNF692.GFP-ChIP-Seq(GSE58341)/Homer |
| **76** | ZSCAN22(Zf)/HEK293-ZSCAN22.GFP-ChIP-Seq(GSE58341)/Homer |

Supplementary Table 4

List of transcription factor motifs with changes in H3K27ac mark.

| **Number** | **Name** |
| --- | --- |
| **1** | AP-1(bZIP)/ThioMac-PU.1-ChIP-Seq(GSE21512)/Homer |
| **2** | Atf3(bZIP)/GBM-ATF3-ChIP-Seq(GSE33912)/Homer |
| **3** | Bach1(bZIP)/K562-Bach1-ChIP-Seq(GSE31477)/Homer |
| **4** | Bach2(bZIP)/OCILy7-Bach2-ChIP-Seq(GSE44420)/Homer |
| **5** | BATF(bZIP)/Th17-BATF-ChIP-Seq(GSE39756)/Homer |
| **6** | BORIS(Zf)/K562-CTCFL-ChIP-Seq(GSE32465)/Homer |
| **7** | CRE(bZIP)/Promoter/Homer |
| **8** | CTCF(Zf)/CD4+-CTCF-ChIP-Seq(Barski_et_al.)/Homer |
| **9** | E2F(E2F)/Hela-CellCycle-Expression/Homer |
| **10** | E2F1(E2F)/Hela-E2F1-ChIP-Seq(GSE22478)/Homer |
| **11** | E2F4(E2F)/K562-E2F4-ChIP-Seq(GSE31477)/Homer |
| **12** | E2F7(E2F)/Hela-E2F7-ChIP-Seq(GSE32673)/Homer |
| **13** | EBNA1(EBV-virus)/Raji-EBNA1-ChIP-Seq(GSE30709)/Homer |
| **14** | E-box(bHLH)/Promoter/Homer |
| **15** | Egr2(Zf)/Thymocytes-Egr2-ChIP-Seq(GSE34254)/Homer |
| **16** | ELF1(ETS)/Jurkat-ELF1-ChIP-Seq(SRA014231)/Homer |
| **17** | Elk1(ETS)/Hela-Elk1-ChIP-Seq(GSE31477)/Homer |
| **18** | Elk4(ETS)/Hela-Elk4-ChIP-Seq(GSE31477)/Homer |
| **19** | ETS(ETS)/Promoter/Homer |
| **20** | ETS:RUNX(ETS,Runt)/Jurkat-RUNX1-ChIP-Seq(GSE17954)/Homer |
| **21** | Ets1-distal(ETS)/CD4+-PolII-ChIP-Seq(Barski_et_al.)/Homer |
| **22** | Fos(bZIP)/TSC-Fos-ChIP-Seq(GSE110950)/Homer |
| **23** | Fosl2(bZIP)/3T3L1-Fosl2-ChIP-Seq(GSE56872)/Homer |
| **24** | Fra1(bZIP)/BT549-Fra1-ChIP-Seq(GSE46166)/Homer |
| **25** | Fra2(bZIP)/Striatum-Fra2-ChIP-Seq(GSE43429)/Homer |
| **26** | GFY(?)/Promoter/Homer |
| **27** | GFY-Staf(?,Zf)/Promoter/Homer |
| **28** | HINFP(Zf)/K562-HINFP.eGFP-ChIP-Seq(Encode)/Homer |
| **29** | Hnf1(Homeobox)/Liver-Foxa2-Chip-Seq(GSE25694)/Homer |
| **30** | IRF2(IRF)/Erythroblas-IRF2-ChIP-Seq(GSE36985)/Homer |
| **31** | ISRE(IRF)/ThioMac-LPS-Expression(GSE23622)/Homer |
| **32** | Jun-AP1(bZIP)/K562-cJun-ChIP-Seq(GSE31477)/Homer |
| **33** | JunB(bZIP)/DendriticCells-Junb-ChIP-Seq(GSE36099)/Homer |
| **34** | JunD(bZIP)/K562-JunD-ChIP-Seq/Homer |
| **35** | MafK(bZIP)/C2C12-MafK-ChIP-Seq(GSE36030)/Homer |
| **36** | NF1:FOXA1(CTF,Forkhead)/LNCAP-FOXA1-ChIP-Seq(GSE27824)/Homer |
| **37** | NF-E2(bZIP)/K562-NFE2-ChIP-Seq(GSE31477)/Homer |
| **38** | NFE2L2(bZIP)/HepG2-NFE2L2-ChIP-Seq(Encode)/Homer |
| **39** | NFkB-p65-Rel(RHD)/ThioMac-LPS-Expression(GSE23622)/Homer |
| **40** | NRF(NRF)/Promoter/Homer |
| **41** | NRF1(NRF)/MCF7-NRF1-ChIP-Seq(Unpublished)/Homer |
| **42** | Nrf2(bZIP)/Lymphoblast-Nrf2-ChIP-Seq(GSE37589)/Homer |
| **43** | p73(p53)/Trachea-p73-ChIP-Seq(PRJNA310161)/Homer |
| **44** | RAR:RXR(NR),DR5/ES-RAR-ChIP-Seq(GSE56893)/Homer |
| **45** | RFX(HTH)/K562-RFX3-ChIP-Seq(SRA012198)/Homer |
| **46** | Rfx1(HTH)/NPC-H3K4me1-ChIP-Seq(GSE16256)/Homer |
| **47** | Rfx2(HTH)/LoVo-RFX2-ChIP-Seq(GSE49402)/Homer |
| **48** | Ronin(THAP)/ES-Thap11-ChIP-Seq(GSE51522)/Homer |
| **49** | Sp1(Zf)/Promoter/Homer |
| **50** | T1ISRE(IRF)/ThioMac-Ifnb-Expression/Homer |
| **51** | TFE3(bHLH)/MEF-TFE3-ChIP-Seq(GSE75757)/Homer |
| **52** | X-box(HTH)/NPC-H3K4me1-ChIP-Seq(GSE16256)/Homer |
| **53** | ZBTB33(Zf)/GM12878-ZBTB33-ChIP-Seq(GSE32465)/Homer |
| **54** | ZKSCAN1(Zf)/HepG2-ZKSCAN1-ChIP-Seq(Encode)/Homer |
