# Supplementary material for: Time-dependent epigenomic changes during 3D spheroid culture improve the preclinical modeling of non-small cell lung cancer
Source: Research Square preprint supplement (doi:10.21203/rs.3.rs-8000509/v1), 2025-11-19

Supplementary file: Uncropped images of the western blot shown in Figure 2G; Figure S4B and Figure S10B. Chemiluminescence images are on the left and corresponding brightfield images are on the right of each panel. Molecular weights are indicated in blue.


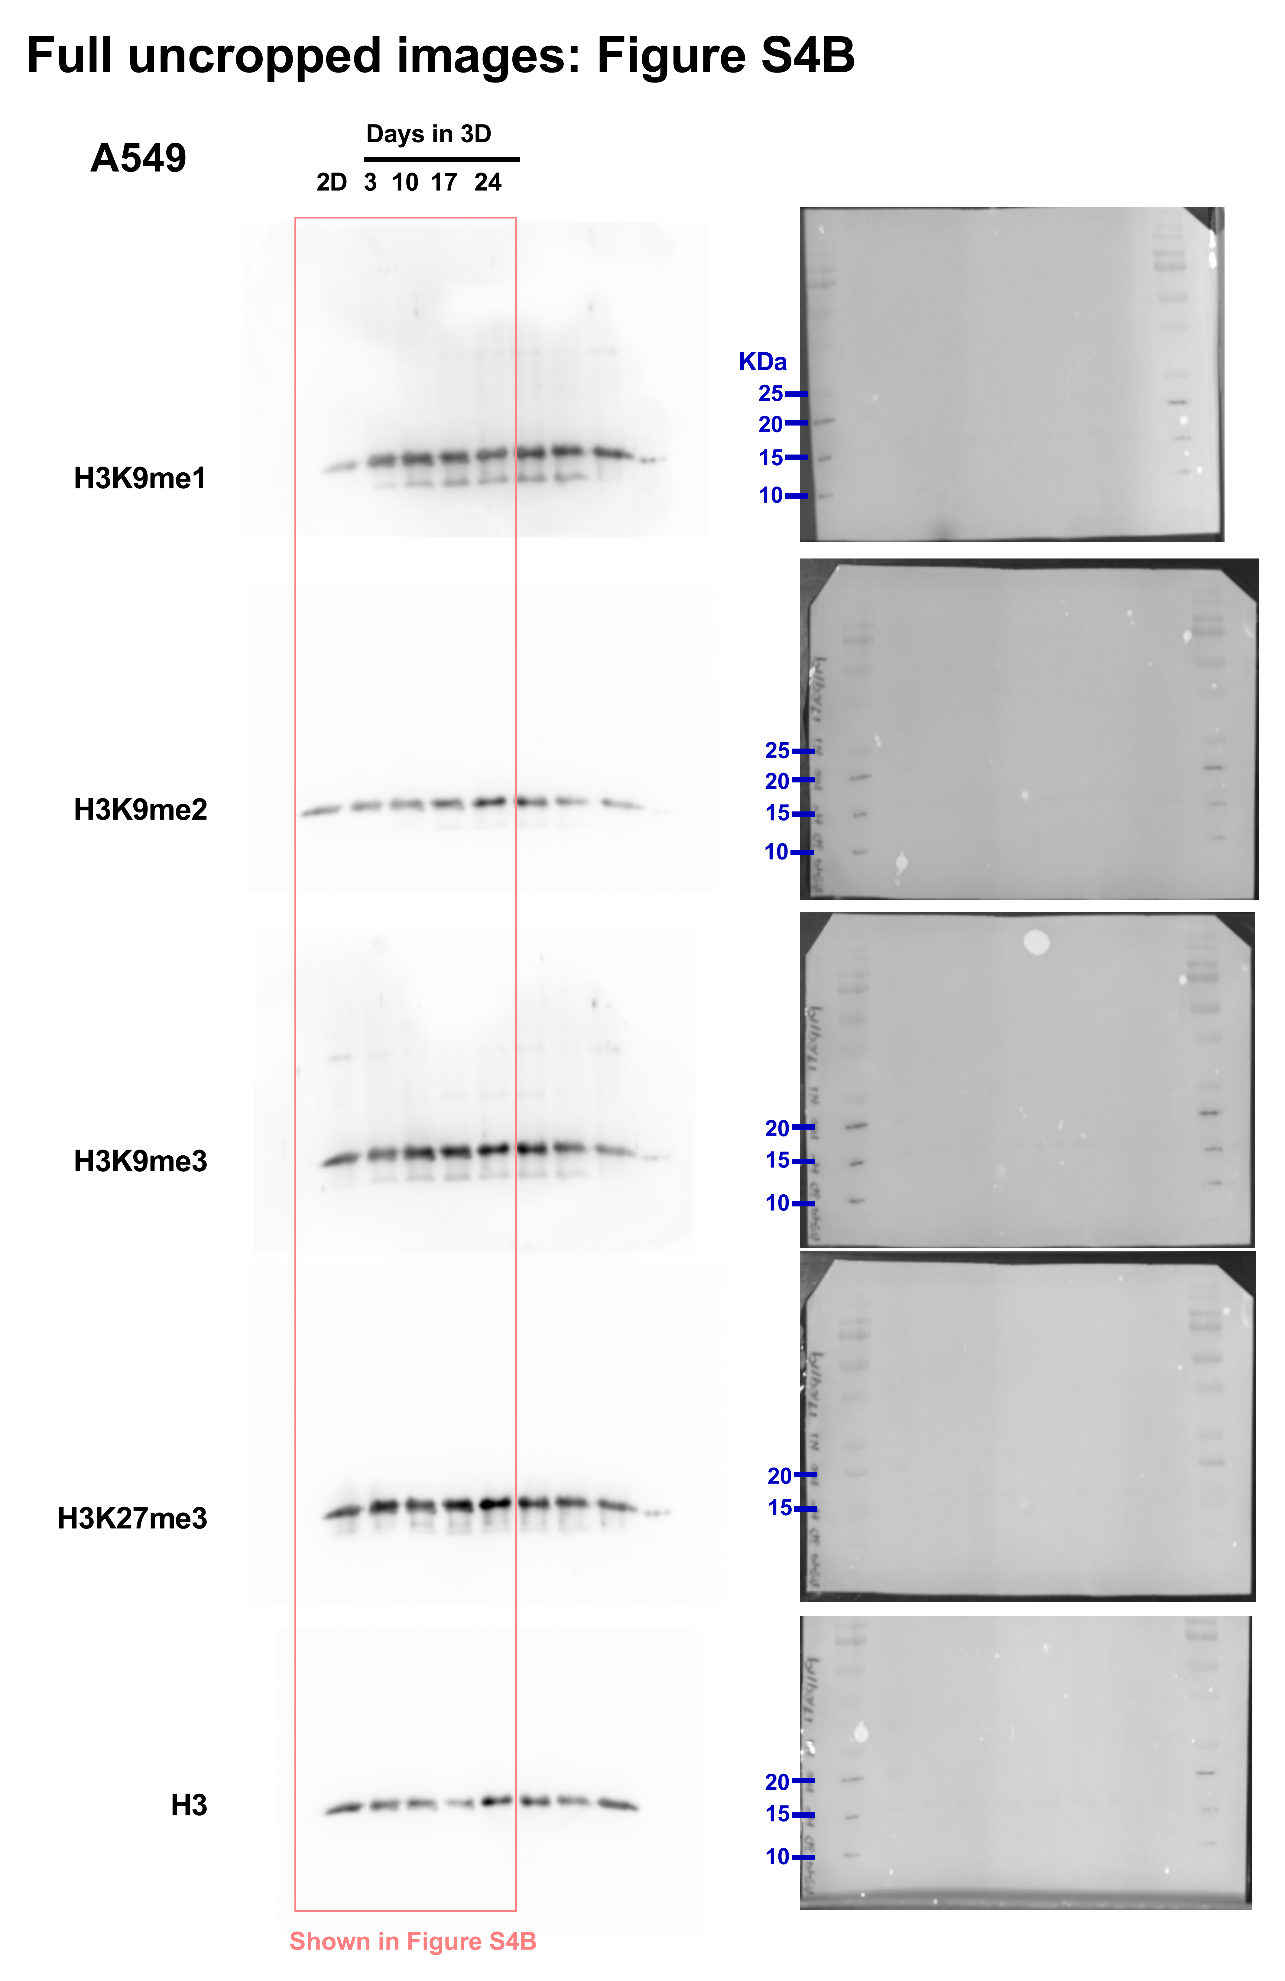

Supplement: Supplementary file 2 [file 303275aa0a474cd4a76211c1.docx]
